1 **Estimating the effect of competition on trait evolution using maximum likelihood inference**

2 Jonathan Drury<sup>1\*</sup>, Julien Clavel<sup>1</sup>, Marc Manceau<sup>1</sup>, & H el ene Morlon<sup>1</sup>

3 <sup>1</sup>*Institut de Biologie de l'Ecole Normale Sup erieure (IBENS), CNRS, Inserm, Ecole Normale*

4 *Sup erieure, PSL Research University, F-75005 Paris, France*

5 \*Correspondence: [drury@biologie.ens.fr](mailto:drury@biologie.ens.fr), +33 (7) 83 11 43 21, *IBENS, 46 rue d'Ulm, F-75005*

6 *Paris, France*

7 Running head: INTERSPECIFIC COMPETITION & TRAIT EVOLUTION

8

## 9 **Abstract**

10           Many classical ecological and evolutionary theoretical frameworks posit that competition  
11 between species is an important selective force. For example, in adaptive radiations, resource  
12 competition between evolving lineages plays a role in driving phenotypic diversification and  
13 exploration of novel ecological space. Nevertheless, current models of trait evolution fit to  
14 phylogenies and comparative datasets are not designed for incorporating the effect of  
15 competition. The most advanced models in this direction are diversity-dependent models where  
16 evolutionary rates depend on lineage diversity. However, these models still treat changes in traits  
17 in one branch as independent of the value of traits on other branches, thus ignoring the effect of  
18 species similarity on trait evolution. Here, we consider a model where the evolutionary dynamics  
19 of traits involved in interspecific interactions are influenced by species similarity in trait values  
20 and where we can specify which lineages are in sympatry. We develop a maximum-likelihood  
21 based approach to fit this model to combined phylogenetic and phenotypic data. Using  
22 simulations, we demonstrate that the approach accurately estimates the simulated parameter  
23 values across a broad range of parameter space. Additionally, we develop tools for specifying the  
24 biogeographic context in which trait evolution occurs. In order to compare models, we also apply  
25 these biogeographic methods to specify which lineages interact sympatrically for two diversity-  
26 dependent models. Finally, we fit these various models to morphological data from a classical  
27 adaptive radiation (Greater Antillean *Anolis* lizards). We show that models that account for  
28 competition and geography perform better than other models. The matching competition model  
29 is an important new tool for studying the influence of interspecific interactions, in particular  
30 competition, on phenotypic evolution. More generally, it constitutes a step toward a better  
31 integration of interspecific interactions in many ecological and evolutionary processes.

32

33 *Keywords:* interspecific competition, trait evolution, phylogenetic comparative methods,

34 adaptive radiation, community phylogenetics, *Anolis*, maximum likelihood

35

36 Interactions between species can be strong selective forces. Indeed, many classical

37 evolutionary theories assume that interspecific competition has large impacts on fitness.

38 Character displacement theory (Brown and Wilson 1956; Grant 1972; Pfennig and Pfennig

39 2009), for example, posits that interactions between species, whether in ecological or social

40 contexts, drive adaptive changes in phenotypes. Similarly, adaptive radiation theory (Schluter

41 2000) has been a popular focus of investigators interested in explaining the rapid evolution of

42 phenotypic disparity (Grant and Grant 2002; Losos 2009; Mahler et al. 2013; Weir and Mursleen

43 2013), and competitive interactions between species in a diversifying clade are a fundamental

44 component of adaptive radiations (Schluter 2000; Losos and Ricklefs 2009; Grant and Grant

45 2011).

46 Additionally, social interactions between species, whether in reproductive (Gröning and

47 Hochkirch 2008; Pfennig and Pfennig 2009) or agonistic (Grether et al. 2009, 2013) contexts, are

48 important drivers of changes in signal traits used in social interactions. Several evolutionary

49 hypotheses predict that geographical overlap with closely related taxa should drive divergence in

50 traits used to distinguish between conspecifics and heterospecifics (e.g., traits involved in mate

51 recognition; Wallace 1889; Fisher 1930; Dobzhansky 1940; Mayr 1963; Gröning and Hochkirch

52 2008; Ord and Stamps 2009; Ord et al. 2011). Moreover, biologists interested in speciation have

53 often argued that interspecific competitive interactions are important drivers of divergence

54 between lineages that ultimately leads to reproductive isolation. Reinforcement, or selection

55 against hybridization (Dobzhansky 1937, 1940), for example, is often thought to be an important  
56 phase of speciation (Grant 1999; Coyne and Orr 2004; Rundle and Nosil 2005; Pfennig and  
57 Pfennig 2009).

58 In addition to the importance of interspecific competition in driving phenotypic  
59 divergence between species, competitive interactions are also central to many theories of  
60 community assembly, which posit that species with similar ecologies exclude each other from  
61 the community (Elton 1946). In spite of the importance of interspecific competition to these key  
62 ecological and evolutionary theories, the role of competition in driving adaptive divergence and  
63 species exclusion from ecological communities has been historically difficult to measure (Losos  
64 2009), because both trait divergence and species exclusion resulting from competition between  
65 lineages during their evolutionary history has the effect of eliminating competition between those  
66 lineages at the present. Community phylogeneticists have aimed to solve part of this conundrum  
67 by analyzing the phylogenetic structure of local communities: assuming that phylogenetic  
68 similarity between two species is a good proxy for their ecological similarity, competitive  
69 interactions are considered to have been more important in shaping communities comprised of  
70 phylogenetically (and therefore ecologically) distant species (Webb et al. 2002; Cavender-Bares  
71 et al. 2009). However, there is an intrinsic contradiction in this reasoning, because using  
72 phylogenetic similarity as a proxy for ecological similarity implicitly (or explicitly) assumes that  
73 traits evolved under a Brownian model of trait evolution, meaning that species interactions had  
74 no effect on trait divergence (Kraft et al. 2007; Cavender-Bares et al. 2009; Mouquet et al. 2012;  
75 Pennell and Harmon 2013).

76 More generally, and despite the preponderance of classical evolutionary processes that  
77 assume that interspecific interactions have important fitness consequences, existing phylogenetic

78 models treat trait evolution within a lineage as independent from traits in other lineages. For  
79 example, in the commonly used Brownian motion and Ornstein-Uhlenbeck models of trait  
80 evolution (Cavalli-Sforza & Edwards 1967, Felsenstein 1988, Hansen and Martins 1996), once  
81 an ancestor splits into two daughter lineages, the trait values in those daughter lineages do not  
82 depend on the trait values of sister taxa. Some investigators have indirectly incorporated the  
83 influence of interspecific interactions by fitting models where evolutionary rates at a given time  
84 depend on the diversity of lineages at that time (e.g., the “diversity-dependent” models of Mahler  
85 et al. 2010, Weir and Mursleen 2013). While these models capture some parts of the interspecific  
86 processes of central importance to evolutionary theory, such as the influence of ecological  
87 opportunity, they do not explicitly account for trait-driven interactions between lineages, as trait  
88 values in one lineage do not vary directly as a function of trait values in other evolving lineages.

89       Recently, Nuismer and Harmon (2015) proposed a model where the evolution of a  
90 species’ trait depends on other species’ traits. In particular, they consider a model, which they  
91 refer to as the model of phenotype matching, where the probability that an encounter between  
92 two individuals has fitness consequences declines as the phenotypes of the individuals become  
93 more dissimilar. The consequence of the encounter on fitness can be either negative if the  
94 interaction is competitive, resulting in character divergence (matching competition, e.g. resource  
95 competition), or positive if the interaction is mutualistic, resulting in character convergence  
96 (matching mutualism, e.g. Müllerian mimicry). Applying Lande’s formula (Lande 1976) and  
97 given a number of simplifying assumptions—importantly that all lineages evolve in sympatry  
98 and that competitive interactions are approximately equivalent across sympatric taxa— this  
99 model yields a simple prediction for the evolution of a population’s mean phenotype.

100           Here, we develop inference tools for fitting a simple version of the matching competition  
101 model (i.e., the phenotype matching model of Nuismer and Harmon incorporating competitive  
102 interactions between lineages) to combined phylogenetic and trait data. We begin by showing  
103 how to compute likelihoods associated with this model. Next, we use simulations to explore the  
104 statistical properties of maximum likelihood estimation of the matching competition model  
105 (parameter estimation as well as model identifiability). While the inclusion of interactions  
106 between lineages is an important contribution to quantitative models of trait evolution, applying  
107 the matching competition model to an entire clade relies on the assumption that all lineages in  
108 the clade are sympatric. However, this assumption will be violated in most empirical cases, so  
109 we also developed a method for incorporating data on the biogeographical overlap between  
110 species for this model and for the linear and exponential diversity-dependent trait models of Weir  
111 & Mursleen (2013), wherein the evolutionary rate at a given time in a tree varies as a function of  
112 the number of lineages in the reconstructed phylogeny at that time (see also Mahler et al. 2010).

113           We then fit the model to data from a classical adaptive radiation: Greater Antillean *Anolis*  
114 lizards (Harmon et al. 2003; Losos 2009). Many lines of evidence support the hypothesis that  
115 resource competition is responsible for generating divergence between species in both habitat use  
116 (e.g., Pacala and Roughgarden 1982) and morphology (Schoener 1970; Williams 1972; see  
117 review in Losos 1994). Thus, we can make an *a priori* prediction that model comparison will  
118 uncover a signature of competition in morphological traits that vary with habitat and resource  
119 use. Given the well-resolved molecular phylogeny (Mahler et al. 2010, 2013) and the relatively  
120 simple geographical relationships between species (i.e., many species are restricted to single  
121 islands, Rabosky and Glor 2010; Mahler and Ingram 2014), the Greater Antillean *Anolis* lizards

122 provide a good test system for exploring the effect of competition on trait evolution using the  
123 matching competition model.

124

## 125 **METHODS**

### 126 *Likelihood Estimation of the Matching Competition Model*

127 We consider the evolution of a quantitative trait under the matching competition model of  
128 Nuismer & Harmon (2015) wherein trait divergence between lineages will be favored by  
129 selection. We make the assumption that the outcome of competitive interactions is similar  
130 between all members of an evolving clade rather than sensitive to pairwise phenotypic similarity  
131 (i.e., that  $\alpha$  in Eq. 1 of Nuismer and Harmon 2015 is small). This assumption is crucial, as it  
132 ensures that the evolution of a population's mean phenotype is given by a linear model (Eq. S38  
133 in Nuismer and Harmon 2015). Importantly, this implies that the expected distribution of trait  
134 values on a given phylogeny follows a multivariate normal distribution (Manceau *et al.*, in prep),  
135 as is the case for classical models of quantitative trait evolution (Hansen and Martin 1996,  
136 Harmon et al. 2010, Weir and Mursleen 2013). In our current treatment of the model, we remove  
137 stabilizing selection to focus on the effect of competition (see Discussion). Under these two  
138 simplifying assumptions, the mean trait value for lineage  $i$  after an infinitesimally small time step  
139  $dt$  is given by (Eq. S38 in Nuismer and Harmon 2015 with  $\psi = 0$ ):

140

$$141 \quad z_i(t + dt) = z_i(t) + S(\mu(t) - z_i(t))dt + \sigma dB_i \quad (\text{Eq. 1})$$

142

143 where  $z_i(t)$  is the mean trait value for lineage  $i$  at time  $t$ ,  $\mu(t)$  is the mean trait value for the  
144 entire clade at time  $t$ ,  $S$  measures the strength of interaction (more intense competitive

145 interactions are represented by larger negative values), and drift is incorporated as Brownian  
146 motion  $\sigma dB_i$  with mean = 0 and variance =  $\sigma^2 dt$ , Note that when  $S = 0$  or  $n = 1$  (i.e., when a  
147 species is alone), this model reduces to Brownian motion. Under the model specified by Eq. 1, if  
148 a species trait value is greater (or smaller) than the trait value average across species in the clade,  
149 the species' trait will evolve towards even larger (or smaller) trait values. We discuss the  
150 strengths and limitations of this formulation of the matching competition in the Discussion.

151         Given that the expected distribution of trait values on a phylogeny under the matching  
152 competition model specified in Eq. 1 follows a multivariate normal distribution, it is entirely  
153 described with its expected mean vector (made of terms each equal to the character value at the  
154 root of the tree) and variance-covariance matrix. Nuismer & Harmon (2015) provide the system  
155 of ordinary differential equations describing the evolution of the variance and covariance terms  
156 through time (their Eqs.10b and 10c). These differential equations can be integrated numerically  
157 from the root to the tips of phylogenies to compute expected variance-covariance matrices for a  
158 given set of parameter values and the associated likelihood values given by the multivariate  
159 normal distribution.

160         Additionally, to relax the assumption that all of the lineages in a clade coexist  
161 sympatrically, we included a term to specify which lineages co-occur at any given time-point in  
162 the phylogeny, which can be inferred, e.g., by biogeographical reconstruction. We define  
163 piecewise constant coexistence matrices  $\mathbf{A}$ , where  $\mathbf{A}_{i,j}$  equals 1 at time  $t$  if  $i$  and  $j$  are sympatric at  
164 that time, and 0 otherwise (Fig. 1). The evolution of the trait value for lineage  $i$  is then given by:

165

$$166 \quad z_i(t + dt) = z_i(t) + S \left( \left( \frac{1}{n_i} \sum_{l=1}^n \mathbf{A}_{i,l} z_l(t) \right) - z_i(t) \right) dt + \sigma dB_i \quad (\text{Eq. 2})$$

167



168 where  $n_i = \sum_{j=1}^n \mathbf{A}_{ij}$  is the number of lineages interacting with lineage  $i$  at time  $t$  (equal to the  
169 number  $n$  of lineages in the reconstructed phylogeny at time  $t$  if all species are sympatric) such  
170 that trait evolution is only influenced by sympatric taxa.

171 We show (Appendix S1) that the corresponding system of ordinary differential equations  
172 describing the evolution of the variance and covariance terms through time is:

173

$$174 \quad \frac{dv_{i,i}}{dt} = -\frac{2S(n_i-1)}{n_i} v_{i,i} + \frac{2S}{n_i} \left( \sum_{\substack{l=1 \\ (l \neq i)}}^n \mathbf{A}_{i,l} v_{l,i} \right) + \sigma^2 \quad (\text{Eq. 3a})$$

175

$$176 \quad \frac{dv_{i,j}}{dt} = -S \left( \frac{n_i-1}{n_i} + \frac{n_j-1}{n_j} \right) v_{i,j} + \frac{S}{n_i} \sum_{\substack{k=1 \\ k \neq i}}^n \mathbf{A}_{i,k} v_{k,j} + \frac{S}{n_j} \sum_{\substack{l=1 \\ l \neq j}}^n \mathbf{A}_{j,l} v_{l,i} \quad (\text{Eq. 3b})$$

177

178 where  $v_{i,i}$  is the variance for each species  $i$  at time  $t$  and  $v_{i,j}$  is the covariance for each species  
179 pair  $i,j$  at time  $t$ . Using numerical integration, we solve this system of ordinary differential  
180 equations from the root of the tree to the tips in order to calculate the values of the variance-  
181 covariance matrix expected under the model for a given phylogeny and set of parameter values.  
182 Specifically, Eq. 3a and 3b dictate the evolution of the variance and covariance values along the  
183 branches of the tree; at a given branching event, the variance and covariance values associated to  
184 the two daughter species are simply inherited from those of the ancestral species. With the  
185 expected variance-covariance matrix at present, we calculate the likelihood for the model using  
186 the likelihood function for a multivariate-normal distribution (e.g. Harmon et al. 2010). Then,  
187 using standard optimization algorithms, we identify the maximum likelihood values for the  
188 model parameters. The matching competition model has three free parameters:  $\sigma^2$ ,  $S$  and the  
189 ancestral state  $z_0$  at the root. As with other models of trait evolution, the maximum likelihood

190 estimate for the ancestral state is computed through GLS using the estimated variance-covariance  
191 matrix (Grafen 1989; Martins and Hansen 1997).

192 We used the ode function in the R package deSolve (Soetaert et al. 2010) to perform the  
193 numerical integration of the differential equations using the “lsoda” solver, and the Nelder-Mead  
194 algorithm implemented in the optim function to perform the maximum likelihood optimization.

195 Codes for these analyses are freely available on github (<https://github.com/hmorlon/PANDA>)

196 and included the R package RPANDA (Morlon et al. MS).

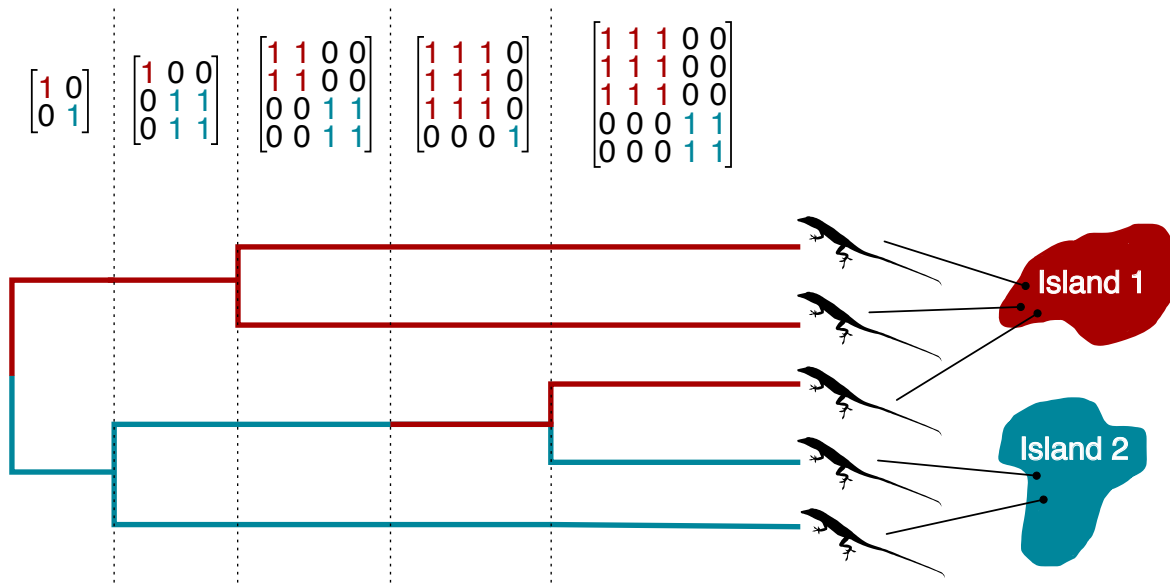

197

*Figure 1.* Illustration of geography matrices (defined between each node and after each dispersal event inferred, e.g., by stochastic mapping) delineating which lineages interact in sympatry in an imagined phylogeny. These matrices were used to identify potentially interacting lineages for the matching competition and both diversity-dependent models of character evolution (see Eqs. 3-5 in the main text). *Anolis* outline courtesy of Sarah Werning, licensed under Creative Commons.

198

199

## 200 *Incorporating Geography into Diversity-Dependent Models*

201           Using the same geography matrix  $\mathbf{A}$  described above for the matching competition model  
202 (Fig. 1), we modified the diversity-dependent linear and exponential models of Weir & Mursleen  
203 (2013) to incorporate biological realism into the models, because ecological opportunity is only  
204 relevant within rather than between biogeographical regions. The resulting variance-covariance  
205 matrices,  $\mathbf{V}$ , of these models have the elements:

$$207 \quad \mathbf{V}_{ij} = \sum_{m=2}^M (\sigma_0^2 + bn_i) (\max(s_{ij} - t_{m-1}, 0) - \max(s_{ij} - t_m, 0)) \quad (\text{Eq. 4})$$

208  
209 for the diversity-dependent linear model, and

$$211 \quad \mathbf{V}_{ij} = \sum_{m=2}^M (\sigma_0^2 \times e^{rn_i}) (\max(s_{ij} - t_{m-1}, 0) - \max(s_{ij} - t_m, 0)) \quad (\text{Eq. 5})$$

212  
213 for the diversity-dependent exponential model, where  $\sigma_0^2$  is the rate parameter at the root of the  
214 tree,  $b$  and  $r$  are the slopes in the linear and exponential models, respectively,  $s_{ij}$  is the shared  
215 path length of lineages  $i$  and  $j$  from the root of the phylogeny to their common ancestor,  $n_i$  is the  
216 number of sympatric lineages (as above) between times  $t_{m-1}$  and  $t_m$  (where  $t_1$  is 0, the time at the  
217 root, and  $t_M$  is the total length of the tree) (Weir & Mursleen 2013). When  $b$  or  $r = 0$ , these  
218 models reduce to Brownian motion. For the linear version of the model, we constrained the  
219 maximum likelihood search such that the term  $(\sigma_0^2 + bn_i)$  in Eq. 3  $\geq 0$  to prevent the model  
220 from having negative evolutionary rates at any  $t_m$ .

221

## 222 *Simulation-based Analysis of Statistical Properties of the Matching Competition Model*

223 To verify that the matching competition model can be reliably fit to empirical data, we  
224 simulated trait datasets to estimate its statistical properties (i.e., parameter estimation and  
225 identifiability using AICc). For all simulations, we began by first generating 100 pure-birth trees  
226 using TreeSim (Stadler 2014). To determine the influence of the number of tips in a tree, we ran  
227 simulations on trees of size  $n = 20, 50, 100,$  and  $150$ . We then simulated continuous trait datasets  
228 by applying the matching competition model recursively from the root to the tip of each tree  
229 (Paradis 2012), following Eq. 1, assuming that all lineages evolved in sympatry. For these  
230 simulations, we set  $\sigma^2 = 0.05$  and systematically varied  $S$  ( $-1.5, -1, -0.5, -0.1,$  or  $0$ ). Finally, we  
231 fit the matching competition model to these datasets using the ML optimization described above.

232 To determine the ability of the approach to accurately estimate simulated parameter  
233 values, we first compared estimated parameters to the known parameters used to simulate  
234 datasets under the matching competition model ( $S$  and  $\sigma^2$ ). We also quantified the robustness of  
235 these estimates in the presence of extinction by estimating parameters for datasets simulated on  
236 birth-death trees; in addition, we compared the robustness of the matching competition model to  
237 extinction to that of the diversity-dependent models. These two latter sets of analyses are  
238 described in detail in the Supplementary Appendix 2.

239 To assess the ability to correctly identify the matching competition model when it is the  
240 generating model, we compared the fit (measured by AICc, Burnham and Anderson 2002) of this  
241 model to other commonly used trait models on the same data (i.e. data simulated under the  
242 matching competition model). Specifically, we compared the matching competition model to (1)  
243 Brownian motion (BM), (2) Ornstein-Uhlenbeck/single-stationary peak model (OU, Hansen &  
244 Martin 1996), (3) exponential time-dependent ( $TD_{exp}$ , i.e., the early burst model, or the ACDC  
245 model with the rate parameter set to be negative, Blomberg et al. 2003; Harmon et al. 2010), (4)

246 linear time-dependent evolutionary rate ( $TD_{lin}$ , Weir and Mursleen 2013), (5) linear rate  
247 diversity-dependent ( $DD_{lin}$ , Mahler et al. 2010; Weir and Mursleen 2013), and (6) exponential  
248 rate diversity-dependent ( $DD_{exp}$ , Weir and Mursleen 2013). These models were fitted using  
249 *geiger* (Harmon et al. 2008) when available there (BM, OU,  $TD_{exp}$ ,  $TD_{lin}$ ), or using our own  
250 codes, available in RPANDA (Morlon et al. MS) when they were not available in *geiger* ( $DD_{lin}$ ,  
251  $DD_{exp}$ ). With the exception of  $TD_{exp}$ , which we restricted to have decreasing rates through time  
252 since it has recently been shown that the accelerating rates version of the model is unidentifiable  
253 from OU (Uyeda et al. 2015), we did not restrict the ML search for the parameters in  $TD_{lin}$  or DD  
254 models.

255 We assessed the identifiability of other trait models against the matching competition  
256 model by calculating the fit of this model to datasets simulated under the same trait models  
257 mentioned above. For BM and OU models, we generated datasets from simulations using  
258 parameter values from the appendix of Harmon et al. 2010 scaled to a tree of length 400 (BM,  $\sigma^2$   
259 = 0.03; OU,  $\sigma^2 = 0.3$ ,  $\alpha = 0.06$ ). For both the linear and exponential versions of the time- and  
260 diversity-dependent models, we simulated datasets with starting rates of  $\sigma^2 = 0.6$  and ending  
261 rates of  $\sigma^2 = 0.01$ , declining with a slope determined by the model and tree (e.g., for time-  
262 dependent models, the slope is a function of the total height of the tree; for the  $TD_{exp}$  model,  
263 these parameters result in a total of 5.9 half-lives elapsing from the root to the tip of the tree,  
264 Slater and Pennell 2014). In another set of simulations, we fixed the tree size at 100 tips and  
265 varied parameter values to determine the effect of parameter values on identifiability (see  
266 Results). As above, we calculated the AICc for all models for each simulated dataset.  
267

268 Finally, to understand how removing stabilizing selection from the likelihood of the  
269 matching competition model affects our inference in the presence of stabilizing selection, we  
270 simulated datasets with both matching competition and stabilizing selection on 100 tip trees,  
271 across a range of parameter space ( $S = -1, -0.5, \text{ and } 0$ ,  $\alpha = 0.05, 0.5, \text{ and } 5$ , holding  $\sigma^2$  at 0.05).  
272 We fit BM, OU, and matching competition models to these simulated datasets. All simulations  
273 were performed using our own codes, available in RPANDA (Morlon 2014).

274

### 275 *Fitting the Matching Competition Model of Trait Evolution to Caribbean Anolis Lizards*

276 To determine whether the matching competition model is favored over models that ignore  
277 interspecific interactions in an empirical system where competition likely influenced character  
278 evolution, we fit the matching competition model to a morphological dataset of adult males from  
279 100 species of Greater Antillean *Anolis* lizards and the time calibrated, maximum clade  
280 credibility tree calculated from a Bayesian sample of molecular phylogenies (Mahler et al. 2010,  
281 2013; Mahler and Ingram 2014). We included the first four size-corrected phylogenetic principal  
282 components from a set of 11 morphological measurements, collectively accounting for 93% of  
283 the cumulative variance explained (see details in Mahler et al. 2013). Each of these axes is  
284 readily interpretable as a suite of specific morphological characters (see Discussion), and  
285 together, the shape axes quantified by these principal components describe the morphological  
286 variation associated with differences between classical ecomorphs in Caribbean anoles (Williams  
287 1972). In addition to the matching competition model, we fit the six previously mentioned  
288 models (BM, OU,  $TD_{\text{exp}}$ ,  $TD_{\text{lin}}$ ,  $DD_{\text{exp}}$ , and  $DD_{\text{lin}}$ ) separately to each phylogenetic PC axis in the  
289 *Anolis* dataset.

290 For the matching competition model and diversity-dependent models, to determine the  
291 influence of uncertainty in designating clades as sympatric and allopatric, we fit the model for  
292 each trait using 101 sets of geography matrices (i.e.,  $\mathbf{A}$  in Eq. 1b, 2, & 3, see Fig. 1): one where  
293 all lineages were set as sympatric, and the remaining 100 with biogeographical reconstructions  
294 from the output of the `make.simmap` function in `phytools` (Revell 2012). To simplify the ML  
295 optimization, we restricted  $S$  to take negative values while fitting the matching competition  
296 model including the biogeographical relationships among taxa.

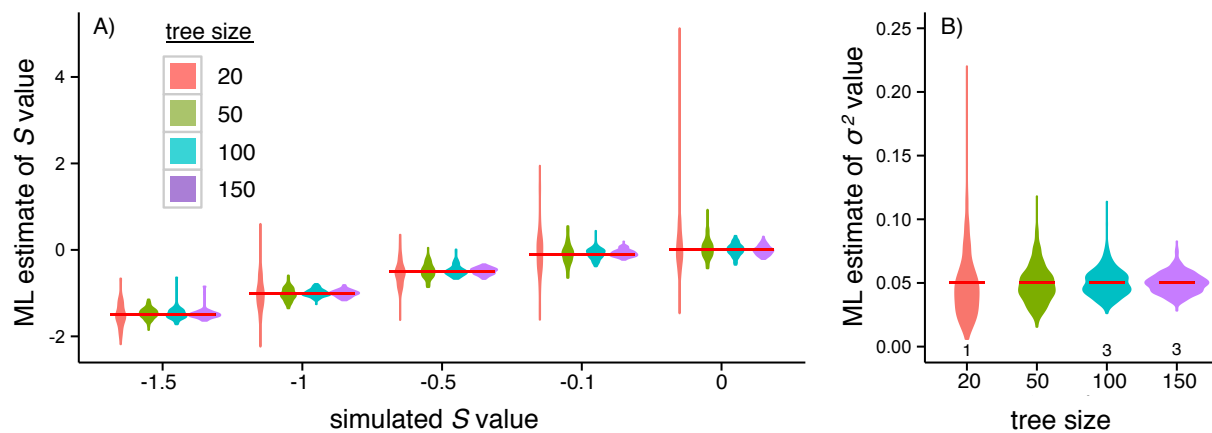

297

298

*Figure 2.* Parameter estimation under the matching competition model. As tree size increases and/or the magnitude of competition increases (i.e., the  $S$  parameter in the matching competition model becomes more negative), so does the accuracy of ML parameter estimates of (A)  $S$  ( $n = 100$  for each tree size and  $S$  value combination; red horizontal lines indicate the simulated  $S$  value) and (B)  $\sigma^2$  ( $n = 500$  for each tree size; red horizontal lines indicate the simulated value). In a small number of cases (7/2000), the ML estimate for  $\sigma^2$  was unusually large ( $> 0.25$ ), and we removed these rare cases for plotting. The numbers below the violin plots in (B) show the number of outliers removed for each tree size.

299 **RESULTS**

300 *Statistical Properties of the Matching Competition Model*

301 Across a range of  $S$  values, maximum likelihood optimization returns reliable estimates  
302 of parameter values for the matching competition model (Fig. 2). As the number of tips  
303 increases, so does the reliability of maximum likelihood parameter values (Fig. 2). Parameter  
304 estimates remain reliable in the presence of extinction, unless the extinction fraction is very large  
305 (i.e.,  $\geq 0.6$ ; Supplementary Appendix 2). When datasets are simulated under the matching  
306 competition model, model selection using AICc generally picks the matching competition model  
307 as the best model (Figs. 3, S1); the strength of this discrimination depends on both the  $S$  value  
308 used to simulate the data and the size of the tree (Figs. 3, S1).

309  
*Figure 3. AICc support for datasets simulated under the matching competition (MC) model increases with tree size and with increasing levels of competition (i.e., increasingly negative  $S$  values). The dotted line denotes 10%.*

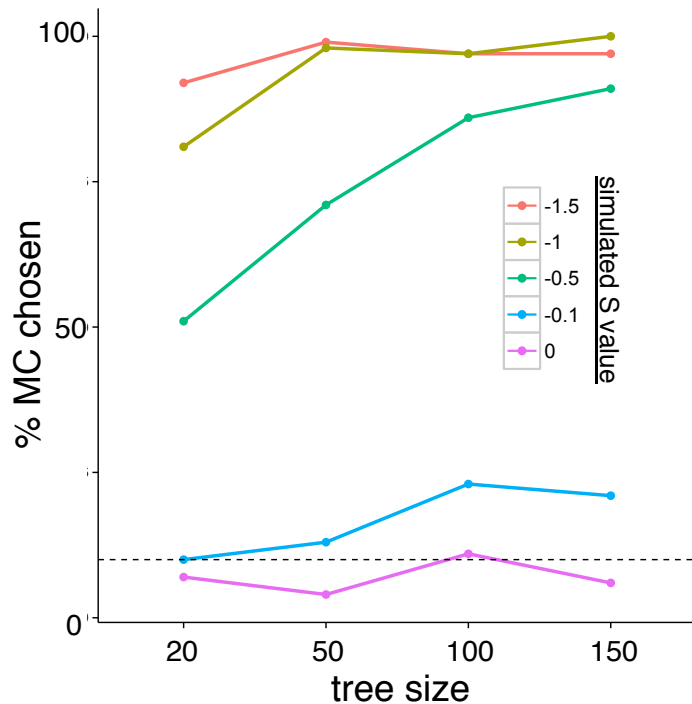

310

311



312 Simulating datasets under BM, OU,  $DD_{exp}$ , and  $DD_{lin}$  generating models, we found that in  
313 most scenarios, and in most parameter space, these models are distinguishable from the matching  
314 competition model (Fig. 4a,b,e,f, Fig. S2). As with the matching competition model, the ability  
315 to distinguish between models using AICc generally increases with increasing tree sizes (Fig. 4)  
316 and with increasing magnitude of parameter values (Fig. S2). When character data were  
317 simulated under a  $TD_{lin}$  model of evolution, the matching competition and/or the diversity-  
318 dependent models tended to have lower AICc values than the  $TD_{lin}$  model, especially among  
319 smaller trees (Figure 4d). For data generated under a  $TD_{exp}$  model, model selection always  
320 favored the matching competition model over the  $TD_{exp}$  model (Fig. 4c).

321 As the strength of stabilizing selection increases relative to the strength of competition  
322 (i.e.,  $\alpha$  as increases relative to  $S$ ) AICc model selection shifts from favoring the matching  
323 competition model (under large  $S$ , small  $\alpha$  scenarios) to favoring the OU model (under small  $S$ ,  
324 large  $\alpha$  scenarios) (Fig. S3). Likewise, maximum likelihood increasingly underestimates the  
325 value of  $S$  as the value of  $\alpha$  increases (Fig. S4).

326

### 327 *Competition in Greater Antillean Anolis Lizards*

328 For the first four phylogenetic principal components describing variation in *Anolis*  
329 morphology, we found that models that incorporate species interactions fit the data better than  
330 models that ignore them (Table 1). PC1, which describes variation in hindlimb/hindtoe length  
331 (Mahler et al. 2013), is fit best by the matching competition model. PC2, which describes  
332 variation in body size (snout vent length) is fit best by the linear diversity-dependent model.  
333 PC3, which describes variation in forelimb/foretoe length, and PC4, which describes variation in

334 lamellae number are fit with mixed support across the models included, but with models  
 335 incorporating species interactions providing the best overall fits.

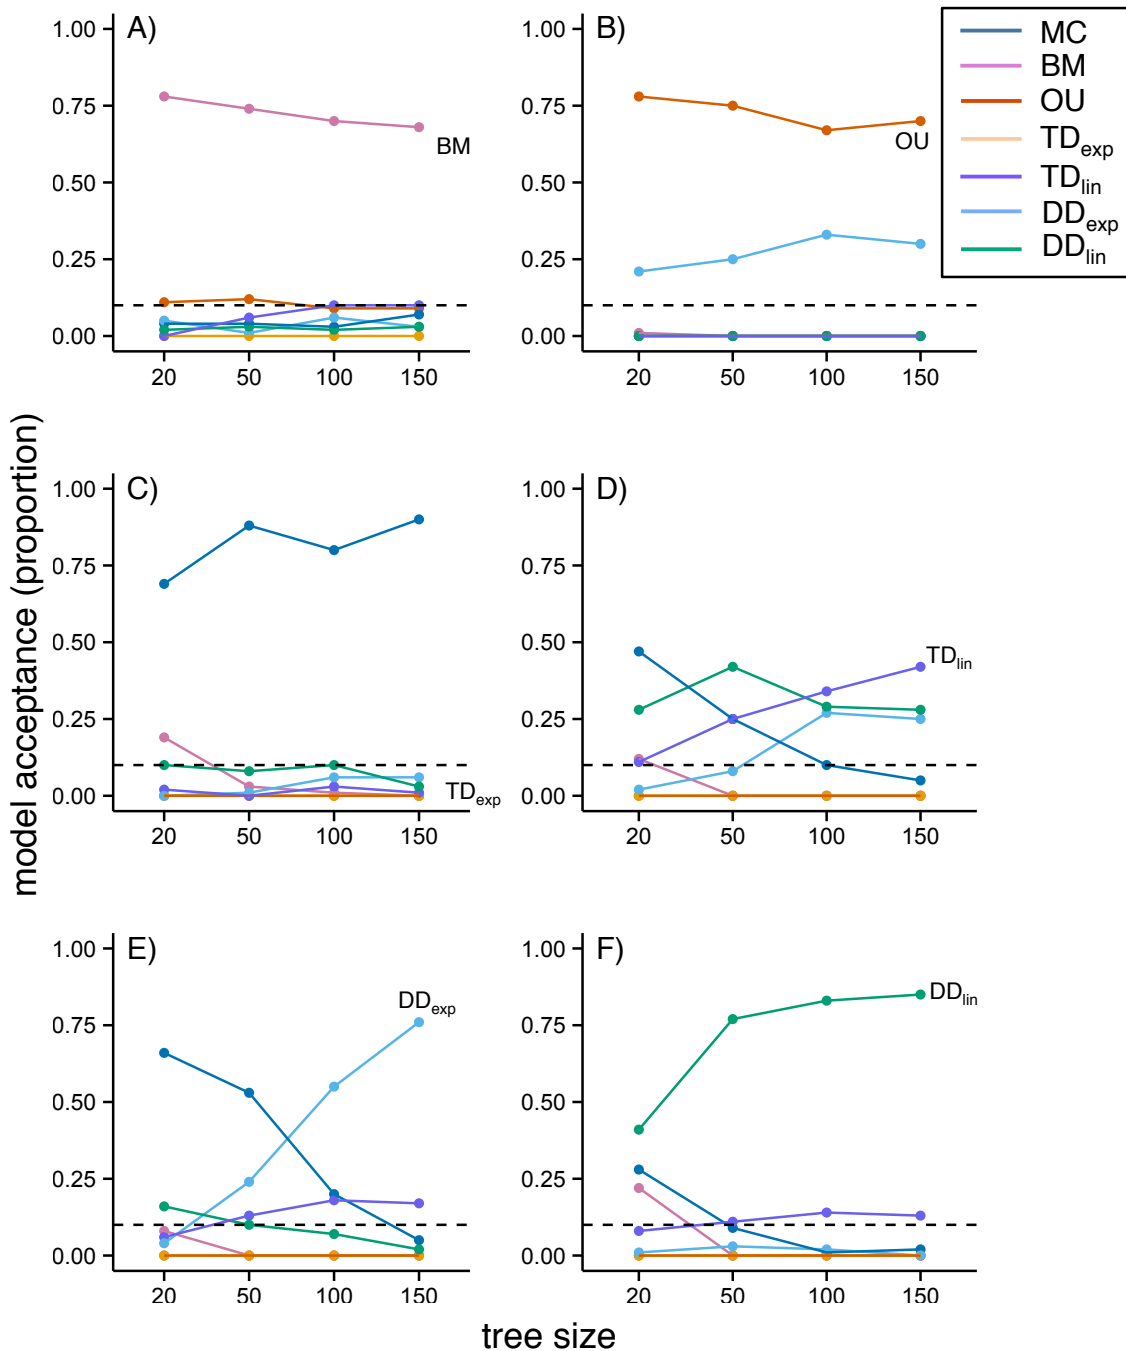

336

Figure 4. Identifiability simulation results for the matching competition (MC) model. When the generating model is either (A) BM, (B) OU, (E) DD<sub>exp</sub> (for larger trees) or (F) DD<sub>lin</sub>, the generating model is largely favored by model selection. However, both (C) TD<sub>exp</sub> and (D) TD<sub>lin</sub> (for smaller trees) are erroneously rejected as the generating model. The dotted lines denote 10%.

337 Additionally, for every PC axis, the best-fit models were ones that incorporated the geographic  
338 relationships among species in the tree, and these conclusions were robust to uncertainty in  
339 ancestral reconstructions of sympatry (Table 1).

340

**Table 1.** Comparison of model fits for the first four phylogenetic principal components of a morphological dataset of Greater Antillean anoles. Models run incorporating geography matrices are indicated by “+ GEO”, and models with the lowest AICc for each trait are shaded and written in bold text. Parameter values presented follow the nomenclature of Eqs. 2-4 in the main text, and  $k$  represents the number of parameters estimated for each model. Note that  $TD_{exp}$  is the ACDC model (or the early-burst model when  $r < 0$ ). OU model weights were excluded because the ML estimates of  $\alpha$  equaled 0 for all PC axes, and thus the OU model was equivalent to BM. Median (standard error) of parameter estimates,  $\Delta AICc$  values, and Akaike weights are presented for fits across 100 sampled stochastic maps of *Anolis* biogeography (standard errors are omitted for Akaike weights < 0.05).

341  
342  
343

| Trait | Model              | k        | $\sigma^2$              | b                         | r                | S                       | ln(L)                | $\Delta$ AICc       | Akaike weights      |
|-------|--------------------|----------|-------------------------|---------------------------|------------------|-------------------------|----------------------|---------------------|---------------------|
| pPC1  | BM                 | 2        | 0.0033                  | —                         | —                | —                       | -13.68               | 21.36 (0.19)        | <0.01               |
|       | OU                 | 3        | 0.0033                  | —                         | —                | —                       | -13.68               | --                  | —                   |
|       | TDexp              | 3        | 0.0324                  | —                         | -0.068           | —                       | -5.20                | 6.51 (0.19)         | 0.03                |
|       | TDlinear           | 3        | 0.0113                  | -0.019                    | —                | —                       | -4.88                | 5.89 (0.19)         | 0.04                |
|       | DDexp              | 3        | 0.0184                  | —                         | -0.028           | —                       | -4.37                | 4.87 (0.19)         | 0.06 (0.004)        |
|       | DDexp + GEO        | 3        | 0.0087 (1.48E-5)        | —                         | -0.043 (7.29E-5) | —                       | -8.00 (0.050)        | 12.05 (0.19)        | <0.01               |
|       | DDlin              | 3        | 0.0089                  | -0.00008                  | —                | —                       | -4.89                | 5.91 (0.19)         | <0.01               |
|       | DDlin + GEO        | 3        | 0.0060 (6.25E-6)        | -0.00011 (1.24E-7)        | —                | —                       | -8.23 (0.034)        | 12.49 (0.18)        | <0.01               |
|       | MC <sub>sym</sub>  | 3        | 0.0010                  | —                         | —                | -0.037                  | -3.67                | 2.96 (0.19)         | 0.16 (0.01)         |
|       | <b>MC + GEO</b>    | <b>3</b> | <b>0.0010 (6.75E-6)</b> | —                         | —                | <b>-0.038 (0.00017)</b> | <b>-1.94 (0.10)</b>  | <b>0 (0.031)</b>    | <b>0.68 (0.02)</b>  |
| pPC2  | BM                 | 2        | 0.0027                  | —                         | —                | —                       | -4.69                | 9.64 (0.036)        | 0.01                |
|       | OU                 | 3        | 0.0027                  | —                         | —                | —                       | -4.69                | --                  | —                   |
|       | TDexp              | 3        | 0.0046                  | —                         | -0.014           | —                       | -4.30                | 10.99 (0.036)       | <0.01               |
|       | TDlinear           | 3        | 0.0047                  | -0.011                    | —                | —                       | -4.23                | 10.85 (0.036)       | <0.01               |
|       | DDexp              | 3        | 0.0041                  | —                         | -0.006           | —                       | -4.27                | 10.94 (0.036)       | <0.01               |
|       | DDexp + GEO        | 3        | 0.0068 (1.36E-5)        | —                         | -0.039 (9.72E-5) | —                       | 0.51 (0.024)         | 1.37 (0.015)        | 0.33 (0.002)        |
|       | DDlin              | 3        | 0.0042                  | -0.00002                  | —                | —                       | -4.21                | 10.82 (0.036)       | <0.01               |
|       | <b>DDlin + GEO</b> | <b>3</b> | <b>0.0054 (4.24E-6)</b> | <b>-0.00010 (9.17E-8)</b> | —                | —                       | <b>1.20 (0.017)</b>  | <b>0 (0)</b>        | <b>0.64 (0.001)</b> |
|       | MC <sub>sym</sub>  | 3        | 0.0021                  | —                         | —                | -9.9e-3                 | -3.95                | 9.79 (0.036)        | <0.01               |
|       | <b>MC + GEO</b>    | <b>3</b> | <b>0.0018 (2.44E-6)</b> | —                         | —                | <b>-0.015 (4.67E-5)</b> | <b>-2.94 (0.010)</b> | <b>8.30 (0.047)</b> | <b>0.01</b>         |
| pPC3  | BM                 | 2        | 0.0010                  | —                         | —                | —                       | 45.57                | 2.56 (0.021)        | 0.09 (0.0003)       |
|       | OU                 | 3        | 0.0010                  | —                         | —                | —                       | 45.57                | --                  | —                   |
|       | TDexp              | 3        | 0.0020                  | —                         | -0.019           | —                       | 46.30                | 3.22 (0.021)        | 0.06 (0.0002)       |
|       | TDlinear           | 3        | 0.0019                  | -0.013                    | —                | —                       | 46.41                | 3.02 (0.021)        | 0.07 (0.0003)       |
|       | DDexp              | 3        | 0.0017                  | —                         | -0.008           | —                       | 46.40                | 3.02 (0.021)        | 0.07 (0.0003)       |
|       | DDexp + GEO        | 3        | 0.0015 (1.48E-6)        | —                         | -0.017 (3.72E-5) | —                       | 46.79 (0.006)        | 2.24 (0.024)        | 0.10 (0.0006)       |
|       | DDlin              | 3        | 0.0017                  | -0.000009                 | —                | —                       | 46.46                | 2.90 (0.021)        | 0.08 (0.0003)       |
|       | DDlin + GEO        | 3        | 0.0014 (8.76E-7)        | -0.000016 (2.96E-8)       | —                | —                       | 46.68 (0.005)        | 2.44 (0.023)        | 0.09 (0.0005)       |
|       | MC <sub>sym</sub>  | 3        | 0.0007                  | —                         | —                | -0.012                  | 46.75                | 2.33 (0.021)        | 0.10 (0.0004)       |
|       | <b>MC + GEO</b>    | <b>3</b> | <b>0.0006 (6.15E-7)</b> | —                         | —                | <b>-0.017 (3.38E-5)</b> | <b>47.91 (0.011)</b> | <b>0 (0)</b>        | <b>0.32 (0.002)</b> |
| pPC4  | BM                 | 2        | 0.0006                  | —                         | —                | —                       | 69.07                | 2.50 (0.016)        | 0.06 (0.0002)       |
|       | OU                 | 3        | 0.0006                  | —                         | —                | —                       | 69.07                | --                  | —                   |
|       | TDexp              | 3        | 0.0015                  | —                         | -0.025           | —                       | 70.55                | 1.66 (0.016)        | 0.09 (0.0003)       |
|       | TDlinear           | 3        | 0.0012                  | -0.013                    | —                | —                       | 70.45                | 1.86 (0.016)        | 0.08 (0.0003)       |
|       | DDexp              | 3        | 0.0012                  | —                         | -0.010           | —                       | 70.52                | 1.73 (0.016)        | 0.08 (0.0003)       |
|       | DDexp + GEO        | 3        | 0.0010 (1.18E-6)        | —                         | -0.020 (4.38E-5) | —                       | 71.28 (0.011)        | 0.13 (0.020)        | 0.18 (0.001)        |
|       | DDlin              | 3        | 0.0011                  | -0.000006                 | —                | —                       | 70.39                | 1.99 (0.016)        | 0.07 (0.0002)       |
|       | DDlin + GEO        | 3        | 0.0009 (5.77E-7)        | -0.000009 (1.98E-8)       | —                | —                       | 70.78 (0.008)        | 1.12 (0.016)        | 0.11 (0.0006)       |
|       | MC                 | 3        | 0.0004                  | —                         | —                | -0.015                  | 71.1                 | 0.57 (0.016)        | 0.15 (0.0005)       |
|       | <b>MC + GEO</b>    | <b>3</b> | <b>0.0004 (4.21E-7)</b> | —                         | —                | <b>-0.016 (3.56E-5)</b> | <b>71.34 (0.009)</b> | <b>0 (0.012)</b>    | <b>0.19 (0.001)</b> |

344 **DISCUSSION**

345           The inference methods we present here represent an important new addition to the  
346 comparative trait analysis toolkit. Whereas previous models had not accounted for the influence  
347 of trait values in other lineages on character evolution, the matching competition model takes  
348 these into account. Furthermore, extending both the matching competition model and two  
349 diversity-dependent trait evolution models to incorporate geographic networks of sympatry  
350 further extends the utility and biological realism of these models.

351           We found that the matching competition model has increasing AICc support and  
352 accuracy of parameter estimation with increasing tree sizes and competition strength. We also  
353 found that, for most of the generating models we tested, AICc-based model selection does not  
354 tend to erroneously select the matching competition model (i.e., these models are identifiable  
355 from the matching competition model). As with all other models, the statistical properties of the  
356 matching competition model will depend on the size and shape of a particular phylogeny as well  
357 as specific model parameter values. Future investigators can employ other approaches, such as  
358 phylogenetic Monte Carlo and posterior predictive simulations directly on their empirical trees  
359 (Boettiger et al. 2012, Slater & Pennell 2014), to assess the confidence they can have in their  
360 results.

361           We did, however, find that data generated under time-dependent models were often fit  
362 better by models that incorporate interspecific interactions (i.e., density-dependent and matching  
363 competition models) (Fig. 4c,d). This was especially true for the TD<sub>exp</sub> model, often referred to  
364 as the early-burst model—the matching competition model nearly always fit data generated  
365 under the TD<sub>exp</sub> model better than the TD<sub>exp</sub> model (Fig. 4c). We do not view this as a major  
366 limitation of the model for two reasons. First, the TD<sub>exp</sub> model is known to be statistically

367 difficult to estimate on neontological data alone (Harmon et al. 2010; Slater et al. 2012a; Slater  
368 and Pennell 2014). Secondly, and more importantly, time-dependent models are not process-  
369 based models, but rather incorporate time since the root of a tree as a proxy for ecological  
370 opportunity or available niche space (Harmon et al. 2010; Mahler et al. 2010; Slater 2015). The  
371 matching competition and density-dependent models explicitly account for the interspecific  
372 competitive interactions that time-dependent models purport to model, thus we argue that these  
373 process-based models are more biologically meaningful than time-dependent models (Moen and  
374 Morlon 2014).

375         We did not incorporate stabilizing selection in our model. Preliminary analyses suggested  
376 that  $S$  and  $\alpha$  are not identifiable, as competition and stabilizing selection operate in opposite  
377 directions. As a result, when trait data are simulated with simultaneous stabilizing selection and  
378 matching competition, the strength of competition is underestimated. In addition, which model is  
379 chosen by model selection depends on the ratio of the strength of attraction toward an optimum  
380 to the strength of competition, with Brownian model being selected at equal strengths (Figs. S3,  
381 S4). Given that many traits involved in competitive interactions are also likely to have been  
382 subject to stabilizing selection (i.e., extreme trait values eventually become targeted by negative  
383 selection), statistical inference under the matching competition model without stabilizing  
384 selection is likely to underestimate the true effect of competition on trait evolution. Future work  
385 aimed at directly incorporating stabilizing selection in the inference tool could provide a more  
386 accurate quantification of the effect of competition, although dealing with the non-identifiability  
387 issue may require incorporating additional data such as fossils.

388         Because the matching competition model depends on the mean trait values in an evolving  
389 clade, maximum likelihood estimation is robust to extinction, whereas the diversity-dependent

390 models are less so (Appendix S2, Figs. S5-S8). Nevertheless, given the failure of maximum  
391 likelihood to recover accurate parameter estimates of the matching competition model at high  
392 levels of extinction ( $\mu: \lambda \geq 0.6$ ), we suggest that these models should not be used in clades where  
393 the extinction rate is known to be particularly high. In such cases, it would be preferable to  
394 modify the inference framework presented here to include data from fossil lineages (Slater et al.  
395 2012a) by adapting the ordinary differential equations described in Eq. 3a and 3b for non-  
396 ultrametric trees.

397         For all of the traits we analyzed, we found that models incorporating both the influence of  
398 other lineages and the specific geographical relationships among lineages were the most strongly  
399 supported models (though less strikingly for PC3 and PC4). Incorporating uncertainty in  
400 biogeographical reconstruction, which we encourage future investigators to do in general,  
401 demonstrated that these conclusions were robust to variation in the designation of allopatry and  
402 sympatry throughout the clade. The matching competition model is favored in the phylogenetic  
403 principal component axis describing variation in relative hindlimb size. Previous research  
404 demonstrates that limb morphology explains between-ecomorph variation in locomotive  
405 capabilities and perch characteristics (Losos 1990, 2009; Irschick et al. 1997), and our results  
406 suggest that the evolutionary dynamics of these traits have been influenced by the evolution of  
407 limb morphology in other sympatric lineages. These results support the assumption that  
408 interspecific interactions resulting from similarity in trait values are important components of  
409 adaptive radiations (Losos 1994, Schluter 2000), a prediction that has been historically difficult  
410 to test (Losos 2009, but see Mahler et al. 2010). In combination with previous research  
411 demonstrating a set of convergent adaptive peaks in morphospace to which lineages are attracted  
412 (Mahler et al. 2013), our results suggest that competition likely played an important role in

413 driving lineages toward these distinct peaks. Because we expect the presence of selection toward  
414 optima to lead to underestimation of the  $S$  parameter in the matching competition model (Figs.  
415 S3, S4), we would have likely detected an even stronger effect of competition in *Anolis* dataset if  
416 we had included stabilizing selection. Recently, Uyeda and colleagues (2015) demonstrated that  
417 the use of principal components can bias inferences of trait evolution. We used BM-based  
418 phylogenetic PC axes here, which should reduce this potential bias (Revell 2009). We recognize  
419 that there is some circularity in assuming BM in order to compute phylogenetic PC axes before  
420 fitting other trait models to these axes; a general solution to address this circularity problem  
421 remains to be found (Uyeda et al. 2015). Uyeda & colleagues suggested that using phylogenetic  
422 PC axes sorts the traits according to specific models. In the Greater Antillean *Anolis* lizards, the  
423 first axes are easily interpretable as specific suite of traits relevant to competitive interactions,  
424 and our results suggest that competition played an important role in shaping the evolution of  
425 these traits.

426         The linear version of Nuismer & Harmon's (2015) model (Eq. 1) results from making the  
427 simplifying assumption that competitive interactions are approximately equivalent across all  
428 sympatric taxa. We used this version here, since currently available likelihood tools for trait  
429 evolution rely on the multivariate normal distribution, which is to be expected only for this linear  
430 form of the model. The current formulation (Eq. 1) corresponds to a scenario in which the rate of  
431 phenotypic evolution in a lineage gets higher as the lineage deviates from the mean phenotype,  
432 although character displacement theory, for example, posits that selection for divergence should  
433 be the strongest when species are most ecologically similar (Brown and Wilson 1956).  
434 Nevertheless, the developments presented here provide an important new set of tools for  
435 investigating the impact of interspecific interactions on trait evolution, and researchers can



436 perform posterior simulations to assess the realism of the resulting inference. Future  
437 development of likelihood-free methods, such as Approximate Bayesian Computation (Slater et  
438 al. 2012b; Kutsukake and Innan 2013), may be possible for fitting the version of the model in  
439 which the outcome of competitive interactions depend on distance in trait space.

440 We imagine that the matching competition model and biogeographical implementations  
441 of diversity-dependent models will play a substantial role in the study of interspecific  
442 competition. For example, by comparing the fits of the matching competition model with other  
443 models that do not include competitive interactions between lineages, biologists can directly test  
444 hypotheses that make predictions about the role of interspecific interactions in driving trait  
445 evolution. In other words, while the effect of competition has been historically difficult to detect  
446 (Losos 2009), it may be detectable in the contemporary distribution of trait values and their  
447 covariance structure (Hansen and Martins 1996; Nuismer and Harmon 2015). The ability to  
448 consider trait distributions among species that arise from a model explicitly accounting for the  
449 effect of species interactions on trait divergence is also an important step toward a more coherent  
450 integration of macroevolutionary models of phenotypic evolution in community ecology.

451 There are many possible extensions of the tools developed in this paper. In the future,  
452 empirical applications of the model can be implemented with more complex geography matrices  
453 that are more realistic for mainland taxa (e.g., using ancestral biogeographical reconstruction,  
454 Ronquist and Sanmartín 2011; Landis et al. 2013), and can also specify degrees of sympatric  
455 overlap (i.e., syntopy). Additionally, the current version of the model is rather computationally  
456 expensive with larger trees (with 100 or more tips). Further work developing an analytical  
457 solution to the model may greatly speed up the likelihood calculation and permit the inclusion of  
458 stabilizing selection.

459           The current form of the model assumes that the degree of competition is equal for all  
460 interacting lineages. Future modifications of the model, such as applications of stepwise AICc  
461 algorithms (Alfaro et al. 2009; Thomas and Freckleton 2012; Mahler et al. 2013) or reversible-  
462 jump Markov Chain Monte Carlo (Pagel and Meade 2006; Eastman et al. 2011; Rabosky 2014;  
463 Uyeda and Harmon 2014), may be useful to either identify more intensely competing lineages or  
464 test specific hypotheses about the strength of competition between specific taxa. Improvements  
465 could also be made on the formulation itself of the evolution of a species' trait as a response to  
466 the phenotypic landscape in which the species occurs. Moreover, a great array of extensions will  
467 come from modeling species interactions not only within clades, but also among interacting  
468 clades, as in the case of coevolution in bipartite mutualistic or antagonistic networks, such as  
469 plant-pollinator or plant-herbivore systems.

470

#### 471 **Acknowledgements**

472           We thank J. Weir for providing R code for diversity-dependent models and E. Lewitus,  
473 O. Missa, F. Anderson, L. Harmon, and two anonymous reviewers for helpful comments on the  
474 manuscript. This research was funded by the Agence Nationale de la Recherche (grant CHEX-  
475 ECOEVOBIO) and the European Research Council (grant 616419-PANDA) to HM.

476 **References**

- 477 Alfaro M.E., Santini F., Brock C., Alamillo H., Dornburg A., Rabosky D.L., Carnevale G.,  
478 Harmon L.J. 2009. Nine exceptional radiations plus high turnover explain species diversity  
479 in jawed vertebrates. *Proc. Natl. Acad. Sci.* 106:13410–13414.
- 480 Blomberg S.P., Garland T., Ives A.R. 2003. Testing for phylogenetic signal in comparative data:  
481 behavioral traits are more labile. *Evolution.* 57:717–745.
- 482 Boettiger C., Coop G., Ralph P. 2012. Is your phylogeny informative? Measuring the power of  
483 comparative methods. *Evolution.* 66:2240–2251.
- 484 Brown W.L., Wilson E.O. 1956. Character displacement. *Syst. Zool.* 5:49.
- 485 Cavender-Bares J., Kozak K.H., Fine P.V.A., Kembel S.W. 2009. The merging of community  
486 ecology and phylogenetic biology. *Ecol. Lett.* 12:693–715.
- 487 Coyne J.A., Orr H.A. 2004. *Speciation*. Sunderland, MA: Sinauer Associates.
- 488 Dobzhansky T. 1937. *Genetics and the Origin of Species*. New York, NY: Columbia University  
489 Press.
- 490 Dobzhansky T. 1940. Speciation as a stage in evolutionary divergence. *Am. Nat.* 74:312–321.
- 491 Eastman J.M., Alfaro M.E., Joyce P., Hipp A.L., Harmon L.J. 2011. A novel comparative  
492 method for identifying shifts in the rate of character evolution on trees. *Evolution.* 65:3578–  
493 3589.
- 494 Elton C. 1946. Competition and the structure of ecological communities. *J. Anim. Ecol.*:54–68.
- 495 Fisher R.A. 1930. *The Genetical Theory of Natural Selection*. Oxford, UK: Oxford University  
496 Press.
- 497 Grafen A. 1989. The phylogenetic regression. *Philos. Trans. R. Soc. Lond. B. Biol. Sci.*  
498 326:119–157.
- 499 Grant P.R., Grant B.R. 2002. Adaptive radiation of Darwin’s finches: Recent data help explain  
500 how this famous group of Galápagos birds evolved, although gaps in our understanding  
501 remain. *Am. Sci.* 90:130–139.
- 502 Grant P.R., Grant B.R. 2011. *How and Why Species Multiply: the Radiation of Darwin’s*  
503 *Finches*. Princeton, NJ: Princeton University Press.
- 504 Grant P.R. 1972. Convergent and divergent character displacement. *Biol. J. Linn. Soc.* 4:39–68.
- 505 Grant P.R. 1999. *Ecology and Evolution of Darwin’s finches*. Princeton, NJ: Princeton  
506 University Press.

- 507 Grether G.F., Anderson C.N., Drury J.P., Kirschel A.N.G., Losin N., Okamoto K., Peiman K.S.  
508 2013. The evolutionary consequences of interspecific aggression. *Ann. N. Y. Acad. Sci.*  
509 1289:48–68.
- 510 Grether G.F., Losin N., Anderson C.N., Okamoto K. 2009. The role of interspecific interference  
511 competition in character displacement and the evolution of competitor recognition. *Biol.*  
512 *Rev.* 84:617–635.
- 513 Gröning J., Hochkirch A. 2008. Reproductive interference between animal species. *Q. Rev. Biol.*  
514 83:257–282.
- 515 Hansen T.F., Martins E.P. 1996. Translating between microevolutionary process and  
516 macroevolutionary patterns: The correlation structure of interspecific data. *Evolution.*  
517 50:1404–1417.
- 518 Harmon L.J., Losos J.B., Jonathan Davies T., Gillespie R.G., Gittleman J.L., Bryan Jennings W.,  
519 Kozak K.H., McPeck M.A., Moreno-Roark F., Near T.J., Purvis A., Ricklefs R.E., Schluter  
520 D., Schulte J.A., Seehausen O., Sidlauskas B.L., Torres-Carvajal O., Weir J.T., Mooers  
521 A.T. 2010. Early bursts of body size and shape evolution are rare in comparative data.  
522 *Evolution.* 64:2385–2396.
- 523 Harmon L.J., Schulte J.A., Larson A., Losos J.B. 2003. Tempo and mode of evolutionary  
524 radiation in iguanian lizards. *Science* 301:961–964.
- 525 Harmon L.J., Weir J.T., Brock C.D., Glor R.E., Challenger W. 2008. GEIGER: investigating  
526 evolutionary radiations. *Bioinformatics.* 24:129–131.
- 527 Irschick D.J., Vitt L.J., Zani P.A., Losos J.B. 1997. A comparison of evolutionary radiations in  
528 mainland and Caribbean *Anolis* lizards. *Ecology.* 78:2191–2203.
- 529 Kraft N.J.B., Cornwell W.K., Webb C.O., Ackerly D.D. 2007. Trait evolution, community  
530 assembly, and the phylogenetic structure of ecological communities. *Am. Nat.* 170:271–  
531 283.
- 532 Kutsukake N., Innan H. 2013. Simulation-based likelihood approach for evolutionary models of  
533 phenotypic traits on phylogeny. *Evolution.* 67:355–367.
- 534 Landis M.J., Matzke N.J., Moore B.R., Huelsenbeck J.P. 2013. Bayesian analysis of  
535 biogeography when the number of areas is large. *Syst. Biol.* 62:789–804.
- 536 Losos J.B., Ricklefs R.E. 2009. Adaptation and diversification on islands. *Nature.* 457:830–836.
- 537 Losos J.B. 1990. The evolution of form and function: morphology and locomotor performance in  
538 West Indian *Anolis* lizards. 44:1189–1203.
- 539 Losos J.B. 1994. Integrative approaches to evolutionary ecology: *Anolis* lizards as model

- 540 systems. *Annu. Rev. Ecol. Syst.* 25:467–493.
- 541 Losos J.B. 2009. *Lizards in an Evolutionary Tree: Ecology and Adaptive Radiation of Anoles.*  
542 Los Angeles, CA: University of California Press.
- 543 Mahler D.L., Ingram T., Revell L.J., Losos J.B. 2013. Exceptional convergence on the  
544 macroevolutionary landscape in island lizard radiations. *Science* 341:292–5.
- 545 Mahler D.L., Ingram T. 2014. Phylogenetic comparative methods for studying clade-wide  
546 convergence. In: Garamszegi L., editor. *Modern Phylogenetic Comparative Methods and*  
547 *Their Application in Evolutionary Biology.* New York, NY: Springer. p. 425–450.
- 548 Mahler D.L., Revell L.J., Glor R.E., Losos J.B. 2010. Ecological opportunity and the rate of  
549 morphological evolution in the diversification of greater Antillean anoles. *Evolution.*  
550 64:2731–2745.
- 551 Martins E.P., Hansen T.F. 1997. Phylogenies and the comparative method: a general approach to  
552 incorporating phylogenetic information into the analysis of interspecific data. *Am. Nat.*  
553 149:646–667.
- 554 Mayr E. 1963. *Animal Species and Evolution.* Cambridge, MA: Harvard University Press.
- 555 Moen D., Morlon H. 2014. Why does diversification slow down? *Trends Ecol. Evol.* 29:190–  
556 197.
- 557 Morlon H, Lewitus E, Condamine FL, Manceau M., Clavel, J., Drury, J. *in revision.* RPANDA:  
558 an R package for macroevolutionary analyses on phylogenetic trees. R package version 1.0.  
559 <http://CRAN.R-project.org/package=RPANDA>. (in revision at *Methods in Ecology &*  
560 *Evolution*)
- 561 Mouquet N., Devictor V., Meynard C.N., Munoz F., Bersier L.-F., Chave J., Coueron P.,  
562 Dalecky A., Fontaine C., Gravel D., Hardy O.J., Jabot F., Lavergne S., Leibold M.,  
563 Mouillot D., Münkemüller T., Pavoine S., Prinzing A., Rodrigues A.S.L., Rohr R.P.,  
564 Thébault E., Thuiller W. 2012. Ecophylogenetics: advances and perspectives. *Biol. Rev.*  
565 87:769–785.
- 566 Nuismer S.L., Harmon L.J. 2015. Predicting rates of interspecific interaction from phylogenetic  
567 trees. *Ecol. Lett.* 18:17–27.
- 568 Ord T.J., King L., Young A.R. 2011. Contrasting theory with the empirical data of species  
569 recognition. *Evolution.* 65:2572–2591.
- 570 Ord T.J., Stamps J.A. 2009. Species identity cues in animal communication. *Am. Nat.* 174:585–  
571 593.
- 572 Pacala S., Roughgarden J. 1982. Resource partitioning and interspecific competition in two two-

- 573 species insular *Anolis* lizard communities. *Science* 217:444–446.
- 574 Pagel M., Meade A. 2006. Bayesian analysis of correlated evolution of discrete characters by  
575 reversible-jump Markov chain Monte Carlo. *Am. Nat.* 167:808–825.
- 576 Paradis E. 2011. *Analysis of Phylogenetics and Evolution with R*. New York, NY: Springer.
- 577 Pennell M.W., Harmon L.J. 2013. An integrative view of phylogenetic comparative methods:  
578 connections to population genetics, community ecology, and paleobiology. *Ann. N. Y.*  
579 *Acad. Sci.* 1289:90–105.
- 580 Pfennig K.S., Pfennig D.W. 2009. Character displacement: Ecological and reproductive  
581 responses to a common evolutionary problem. *Q. Rev. Biol.* 84:253–276.
- 582 Rabosky D.L., Glor R.E. 2010. Equilibrium speciation dynamics in a model adaptive radiation of  
583 island lizards. *Proc. Natl. Acad. Sci.* 107:22178–22183.
- 584 Rabosky D.L. 2014. Automatic detection of key innovations, rate shifts, and diversity-  
585 dependence on phylogenetic trees. *PLoS One.* 9:e89543.
- 586 Revell L.J. 2009. Size-correction and principal components for interspecific comparative studies.  
587 *Evolution.* 63:3258–3268.
- 588 Revell L.J. 2012. phytools: An R package for phylogenetic comparative biology (and other  
589 things). *Methods Ecol. Evol.* 3:217–223.
- 590 Ronquist F., Sanmartín I. 2011. Phylogenetic methods in biogeography. *Annu. Rev. Ecol. Evol.*  
591 *Syst.* 42:441–464.
- 592 Rundle H.D., Nosil P. 2005. Ecological speciation. *Ecol. Lett.* 8:336–352.
- 593 Schluter D. 2000. *The Ecology of Adaptive Radiation*. Oxford, UK: Oxford University Press.
- 594 Schoener T.W. 1970. Size patterns in West Indian *Anolis* lizards. II. Correlations with the sizes  
595 of particular sympatric species-displacement and convergence. *Am. Nat.* 104:155–174.
- 596 Slater G.J., Harmon L.J., Alfaro M.E. 2012a. Integrating fossils with molecular phylogenies  
597 improves inference of trait evolution. *Evolution.* 66:3931–3944.
- 598 Slater G.J., Harmon L.J., Wegmann D., Joyce P., Revell L.J., Alfaro M.E. 2012b. Fitting models  
599 of continuous trait evolution to incompletely sampled comparative data using approximate  
600 Bayesian computation. *Evolution.* 66:752–762.
- 601 Slater G.J., Pennell M.W. 2014. Robust regression and posterior predictive simulation increase  
602 power to detect early bursts of trait evolution. *Syst. Biol.* 63:293–308.
- 603 Soetaert K., Petzoldt T., Setzer R.W. 2010. Solving differential equations in R: package deSolve.  
604 *J. Stat. Softw.* 33:1–25.

- 605 Stadler T. 2014. TreeSim: Simulating trees under the birth-death model. R package version  
606 2.1. <http://CRAN.R-project.org/package=TreeSim>.
- 607 Thomas G.H., Freckleton R.P. 2012. MOTMOT: models of trait macroevolution on trees.  
608 *Methods Ecol. Evol.* 3:145–151.
- 609 Uyeda J.C., Caetano D.S., Pennell M.W. 2015. Comparative analysis of principal components  
610 can be misleading. *Syst. Biol.* 64:677–689.
- 611 Uyeda J.C., Harmon L.J. 2014. A novel Bayesian method for inferring and interpreting the  
612 dynamics of adaptive landscapes from phylogenetic comparative data. *Syst. Biol.* 63:902–  
613 918.
- 614 Wallace A.R. 1889. *Darwinism*. 2007 facs., Cosimo, Inc.
- 615 Webb C.O., Ackerly D.D., McPeck M.A., Donoghue M.J. 2002. Phylogenies and community  
616 ecology. *Annu. Rev. Ecol. Syst.*:475–505.
- 617 Weir J.T., Mursleen S. 2013. Diversity-dependent cladogenesis and trait evolution in the  
618 adaptive radiation of the auks (Aves: Alcidae). *Evolution*. 67:403–416.
- 619 Williams E.E. 1972. The origin of faunas. Evolution of lizard congeners in a complex island  
620 fauna: A trial analysis. *Evol. Biol.* 6:47–89.
- 621
- 622
- 623

624 **Supplementary Material**

625

626 Appendix S1 & S2

627

628 Table S1

629

630 Figure S1-S8

631

632

633

634

635



## 1 Supplementary Appendix 1

Considering that  $n$  lineages are interacting at time  $t$ , each trait  $i$  evolves following the equation :

$$dz_i(t) = z_i(t + dt) - z_i(t) = S \left( \left( \frac{1}{n_i} \sum_{l=1}^n A_{i,l} z_l(t) \right) - z_i(t) \right) dt + \sigma dB_i(t)$$

Where  $A_{i,l}$  is equal to 1 if lineages  $i$  and  $l$  are sympatric, and to 0 otherwise,  $n_i = \sum_{l=1}^n A_{i,l}$  is the total number of lineages in sympatry with lineage  $i$ , and  $B_i(t)$  represents standard Brownian motion.

Here, we present the derivation of Equations 3a and 3b from the main text. To make the derivation easier to follow, we drop the dependence on time  $t$ , replacing  $z_i(t)$  with  $z_i$  and  $B_i(t)$  with  $B_i$ .

First, applying the Itô formula to these stochastic processes gives us :

$$\begin{aligned} d(z_i z_j) &= z_i dz_j + z_j dz_i + d \langle z_i, z_j \rangle \\ &= S \left( \left( \frac{1}{n_j} \sum_{l=1}^n A_{j,l} z_l z_i \right) - z_j z_i \right) dt + \sigma z_i dB_j \\ &\quad + S \left( \left( \frac{1}{n_i} \sum_{k=1}^n A_{i,k} z_k z_j \right) - z_j z_i \right) dt + \sigma z_j dB_i \\ &\quad + \sigma^2 \mathbf{1}_{i=j} dt \end{aligned}$$

where  $\mathbf{1}_{i=j}$  equals one if  $i = j$  and zero otherwise.

Taking this expectation, it follows that :

$$\begin{aligned} \frac{d}{dt} \mathbb{E}(z_i z_j) &= S \left( \left( \frac{1}{n_j} \sum_{l=1}^n A_{j,l} \mathbb{E}(z_l z_i) \right) - \mathbb{E}(z_j z_i) \right) dt \\ &\quad + S \left( \left( \frac{1}{n_i} \sum_{k=1}^n A_{i,k} \mathbb{E}(z_k z_j) \right) - \mathbb{E}(z_j z_i) \right) dt \\ &\quad + \sigma^2 \mathbf{1}_{i=j} dt \end{aligned}$$

Moreover, we get :

$$\frac{d}{dt} \mathbb{E}(z_i) = S \left( \left( \frac{1}{n_i} \sum_{l=1}^n A_{i,l} \mathbb{E}(z_l) \right) - \mathbb{E}(z_i) \right) dt$$

which leads to :

$$\begin{aligned} \frac{d}{dt} (\mathbb{E}(z_i) \mathbb{E}(z_j)) &= \mathbb{E}(z_j) \frac{d}{dt} \mathbb{E}(z_i) + \mathbb{E}(z_i) \frac{d}{dt} \mathbb{E}(z_j) \\ &= S \left( \left( \frac{1}{n_i} \sum_{k=1}^n A_{i,k} \mathbb{E}(z_k) \mathbb{E}(z_j) \right) - \mathbb{E}(z_i) \mathbb{E}(z_j) \right) dt \\ &\quad + S \left( \left( \frac{1}{n_j} \sum_{l=1}^n A_{j,l} \mathbb{E}(z_l) \mathbb{E}(z_i) \right) - \mathbb{E}(z_j) \mathbb{E}(z_i) \right) dt \end{aligned}$$

Taking together these different parts gives us the ODE satisfied by all covariances (denoted  $v_{i,j} = \text{Cov}(z_i, z_j)$ ) :

$$\begin{aligned} \frac{d}{dt} v_{i,j} &= \frac{d}{dt} (\mathbb{E}(z_i z_j) - \mathbb{E}(z_i) \mathbb{E}(z_j)) \\ &= -2S v_{i,j} + \frac{S}{n_i} \sum_{k=1}^n A_{i,k} v_{k,j} + \frac{S}{n_j} \sum_{l=1}^n A_{j,l} v_{l,i} + \sigma^2 \mathbf{1}_{i=j} \end{aligned} \quad (1)$$

Using these derivations, the variance terms ( $i = j$ ) are calculated using:

$$\frac{d}{dt}v_{i,i} = -\frac{2S(n_i - 1)}{n_i}v_{i,i} + \frac{2S}{n_i} \sum_{\substack{l=1 \\ l \neq i}}^n A_{i,l}v_{l,i} + \sigma^2 \quad (2)$$

The covariance terms ( $i \neq j$ ) are calculated using:

$$\frac{d}{dt}v_{i,j} = -S \left( \frac{n_i - 1}{n_i} + \frac{n_j - 1}{n_j} \right) v_{i,j} + \frac{S}{n_i} \sum_{\substack{k=1 \\ k \neq i}}^n A_{i,k}v_{k,j} + \frac{S}{n_j} \sum_{\substack{l=1 \\ l \neq j}}^n A_{j,l}v_{l,i} \quad (3)$$

In the case where lineages  $i$  and  $j$  are in sympatry, this formula simplifies to:

$$\frac{d}{dt}v_{i,j} = -\frac{2S(n_i - 1)}{n_i}v_{i,j} + \frac{S}{n_i} \left( \sum_{\substack{k=1 \\ k \neq i}}^n A_{i,k}v_{k,j} + \sum_{\substack{l=1 \\ l \neq j}}^n A_{j,l}v_{l,i} \right) \quad (4)$$

To solve the ODEs for the variance and covariance terms from the root to the tip, we begin by fixing the variance  $v_0$  for the process at the root to 0. At each speciation event, the starting value for both the variance of each of the new lineages and the covariance between the two new lineages is the variance of the immediate ancestor at the time of the speciation event, and the starting value for the covariance between the new lineages and any other persisting lineage is set to the value of the covariance between the persisting lineage and the ancestor of the new lineages at the time of speciation.

636 *Supplementary Appendix 2: Estimating the effect of extinction on parameter estimation for*  
637 **the matching competition and density-dependent models.**

638

639         Given that the matching competition and diversity-dependent models take into account  
640 the number of interacting lineages, extinction may affect our ability to recover true parameter  
641 values. To estimate the impact of extinction, we simulated 100 trees with 100 extant species,  
642 varying the extinction fraction ( $\mu: \lambda = 0.2, 0.4, 0.6, \text{ and } 0.8$ ). As above, we recursively simulated  
643 traits using the matching competition model with  $\sigma^2 = 0.05$  and  $S = -1.5, -1, -0.5, -0.1, \text{ or } 0$ , and  
644 the linear and exponential diversity-dependent models with starting rates of  $\sigma^2 = 0.6$  and ending  
645 rates of  $\sigma^2 = 0.01$ . We then estimated the maximum likelihood parameter estimates for the  
646 generating models by fitting the models to the trait values for extant species and the tree with  
647 extinct lineages removed. In the case of the matching competition model, because many  
648 simulated birth-death trees with high extinction rates have substantially older root ages, the  
649 simulated trait datasets for some trees had very large variances. For these biologically unrealistic  
650 trait datasets (i.e., variance in trait values  $\geq 1 \times 10^8$ ), ML does not yield reliable parameter  
651 estimates, so we removed them from further analyses (the sample size of included simulations is  
652 reported in Fig. S5, S6).

653         Parameter estimates are quite robust to extinction under the matching competition model  
654 (Fig. S5, S6), and much more so than under both diversity-dependent models (Fig. S7, S8).  
655 Under the matching competition model, the maximum likelihood optimization returns reliable  
656 estimates of  $S$  and  $\sigma^2$  values used to simulate datasets on trees with extinct lineages (Fig. S5,  
657 S6), although the estimates become much less reliable with larger extinction fractions, likely  
658 because simulations under the matching competition model were unbounded, resulting in trait

659 datasets with biologically unrealistic variances. Under both diversity-dependent models, the  
660 magnitude of both the slope and  $\sigma^2$  parameter values are increasingly underestimated with  
661 increasing extinction fractions (Fig. S7, S8).

662  
663  
664

665 *Supplementary Figure 1.* As tree size and/or the degree of competition ( $S$ ) increases, model  
666 selection becomes more reliable. Comparison of Akaike weights (median & 90% CIs) for NH,  
667 BM, OU, and EB models when simulated under various levels of competition ( $S = -1.5, -1, -0.5,$   
668  $-0.1,$  and  $0$ ) for trees with 20, 50, 100, and 150 tips.  
669

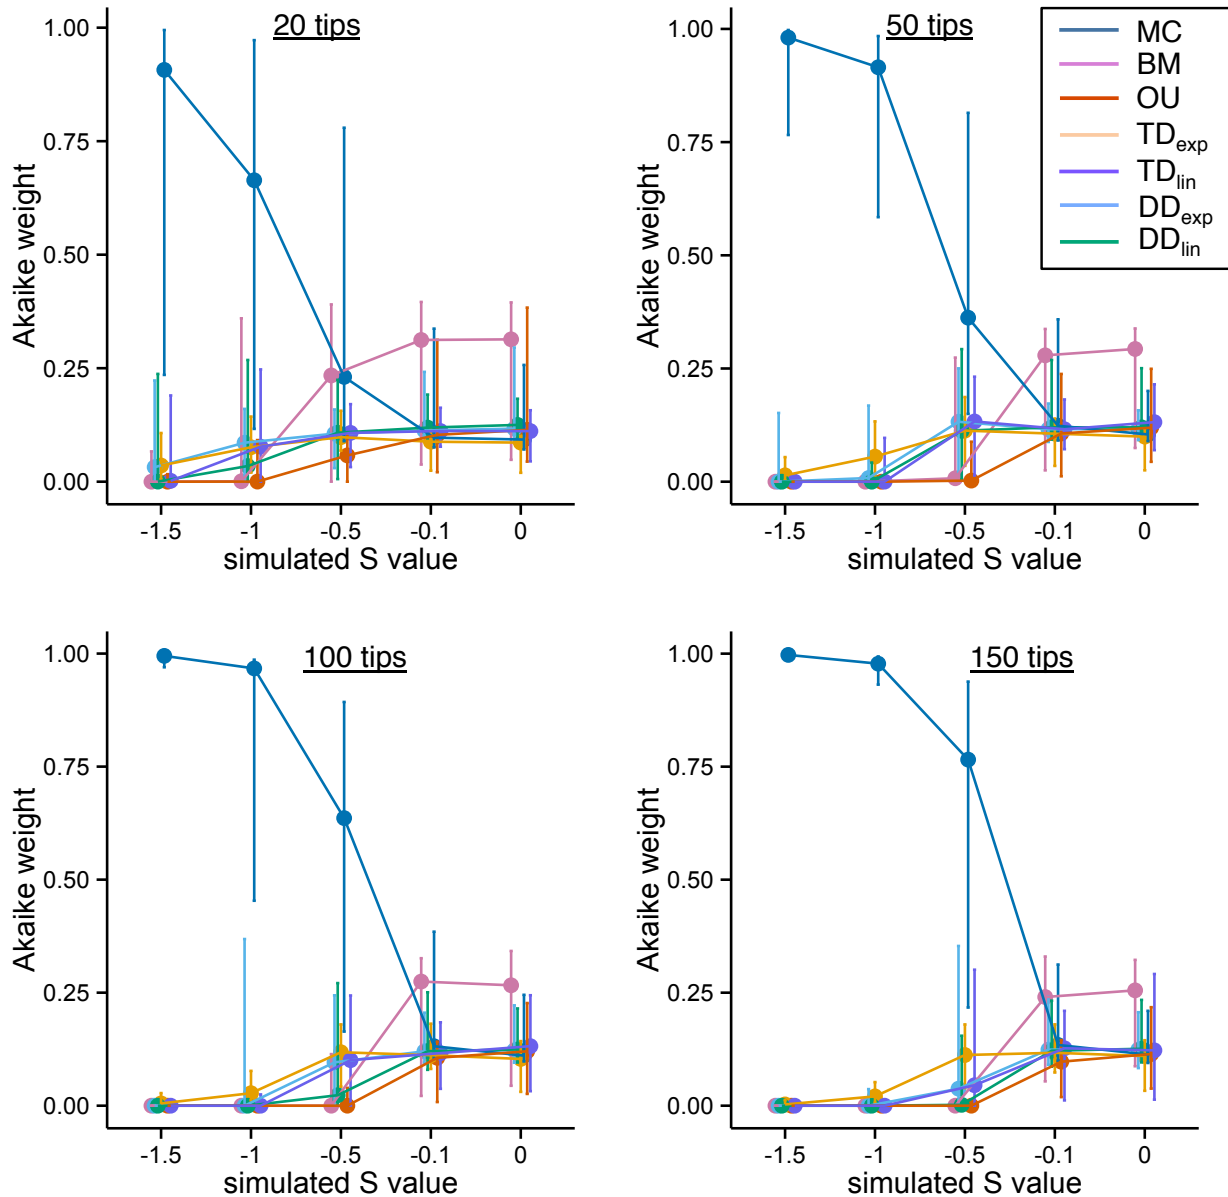

670  
671  
672

673 *Supplementary Figure 2.* Identifiability simulation results for the matching competition model as  
 674 a function of varying parameter values of the generating models. Parameter values are (A)  $\sigma^2$  for  
 675 BM, (B)  $\alpha$  for OU ( $\sigma^2$  was fixed at 0.3), and the  $\sigma^2$  value at the root for (C) TD<sub>exp</sub>, (D) TD<sub>lin</sub>, (E)  
 676 DD<sub>exp</sub>, and (F) DD<sub>lin</sub> (for C-F,  $\sigma^2$  at the present was fixed at 0.01).

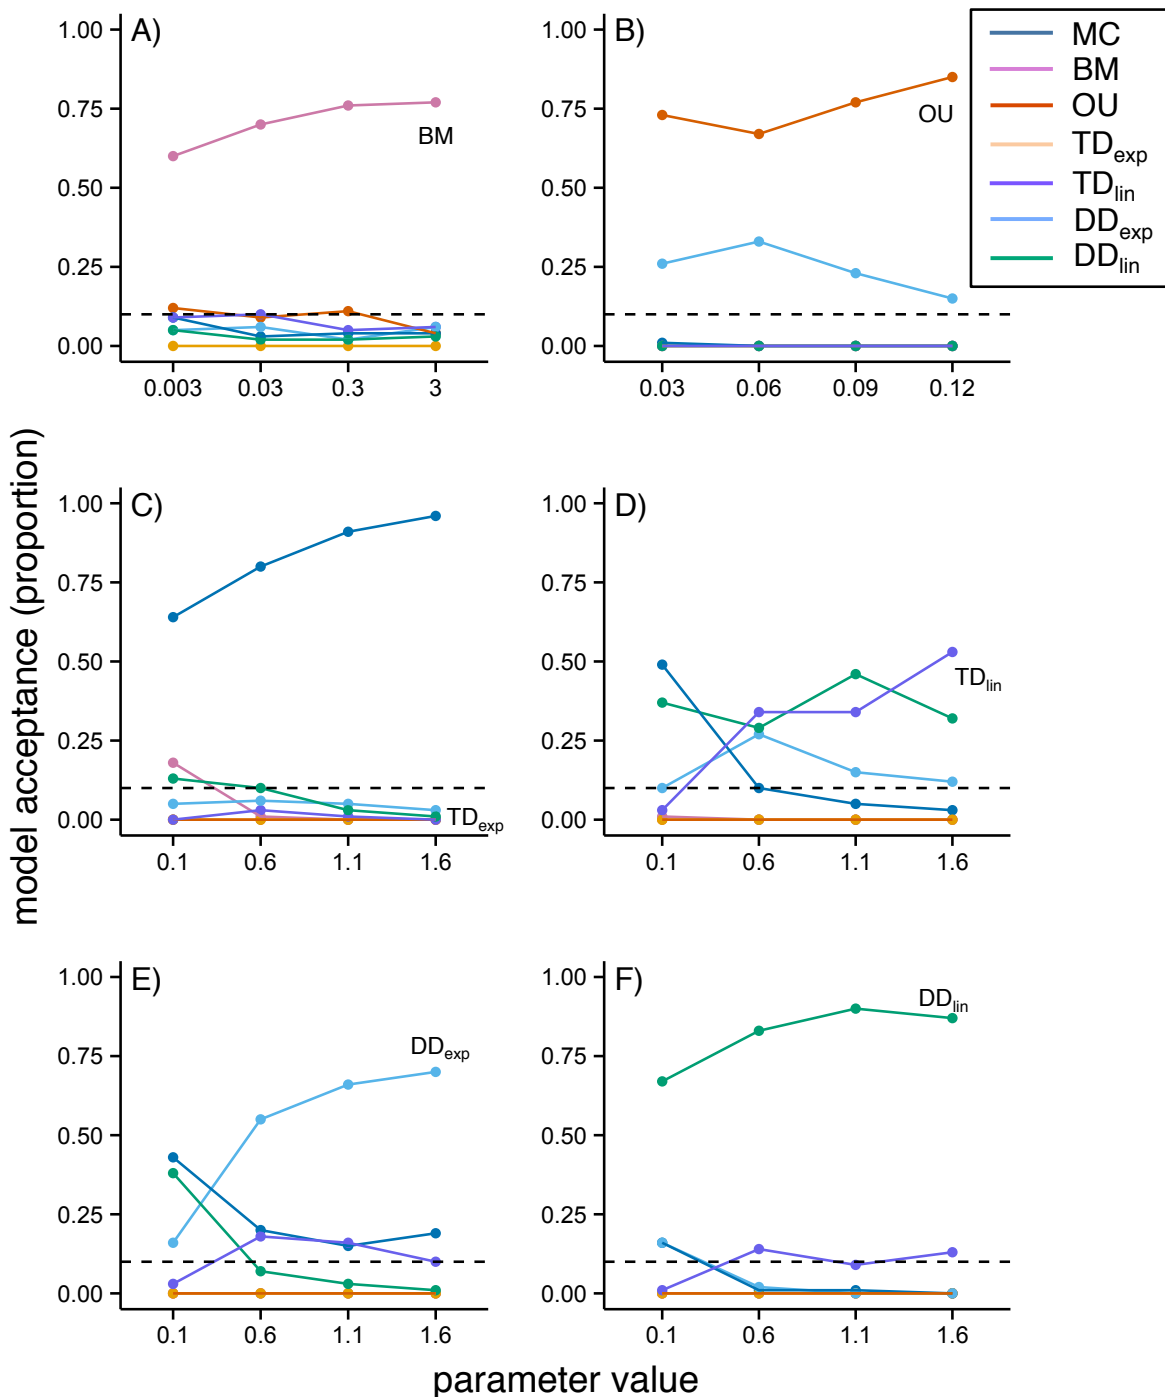

677

678 *Supplementary Figure 3.* The effect of incorporating stabilizing selection into trait evolution on  
679 model selection. For datasets generated under the matching competition model with stabilizing  
680 selection included, as the ratio of the strength competition ( $S$ ) to the strength of selection toward  
681 an optimum ( $\alpha$ ) varies, so does the model preferred by model selection.

682

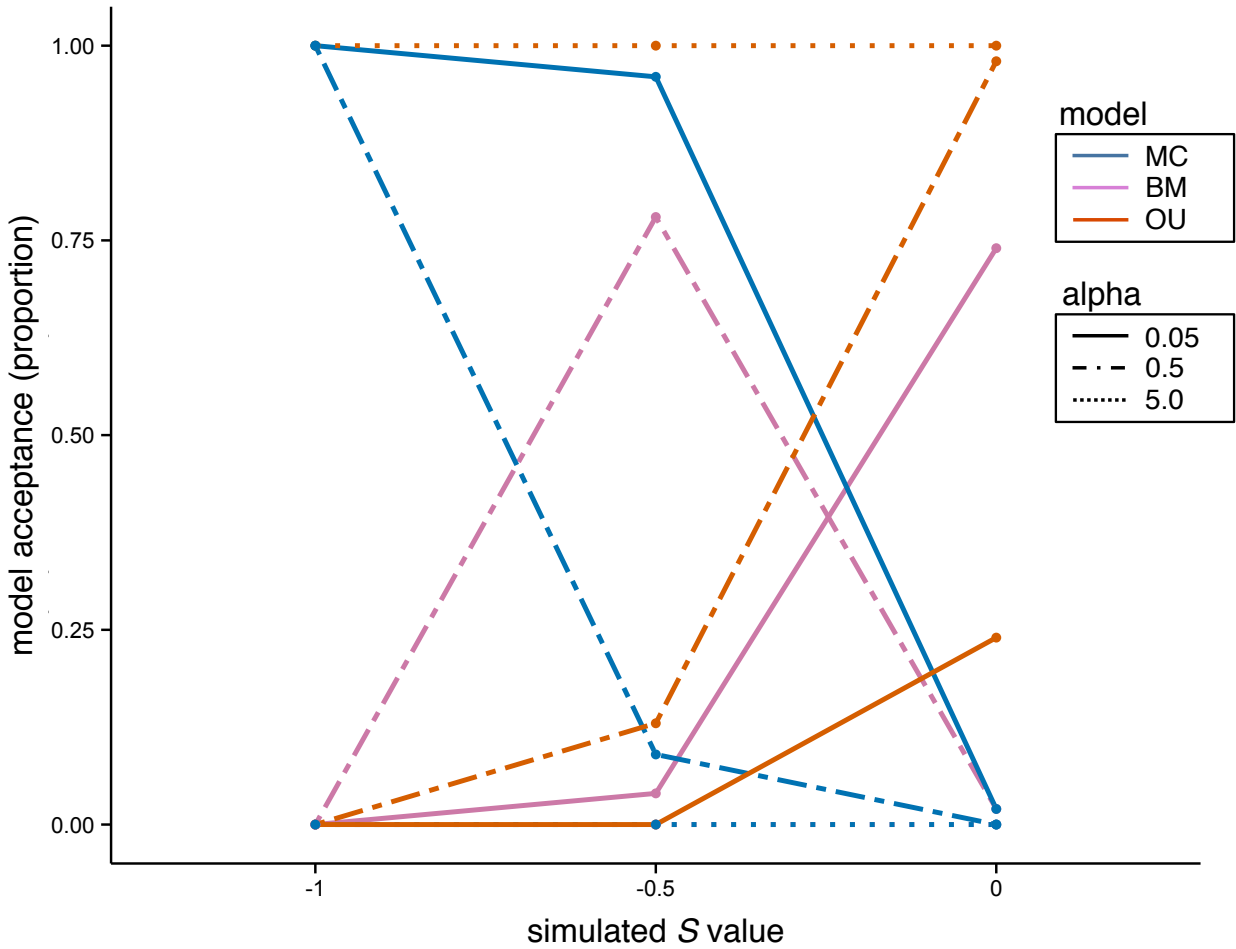

683

684 *Supplementary Figure 4.* The effect of incorporating stabilizing selection into trait evolution on  
685 parameter estimation. As the strength of stabilizing selection increases (i.e., as  $\alpha$  increases),  
686 maximum likelihood under the matching competition model underestimates the true  $S$  value used  
687 to simulate datasets. Positive  $S$  values represent selection toward, rather than away, from the  
688 clade mean and are thus expected when the ratio of  $\alpha$  to  $S$  is large. The horizontal red line  
689 represents the simulated  $S$  value, and the dashed horizontal line represents  $S = 0$ .

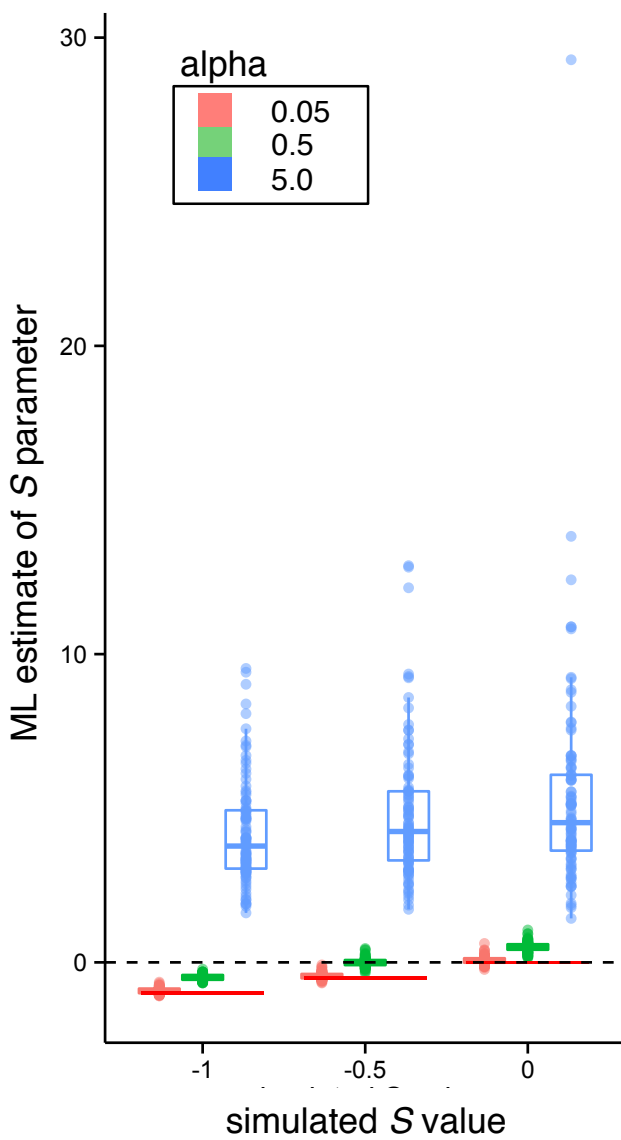

690



691 *Supplementary Figure 5.* Simulation results showing the effect of varying the extinction fraction  
 692 on estimation of the  $S$  parameter for the matching competition model. Red horizontal lines  
 693 indicate the simulated  $S$  values, and numbers above sets of simulations indicate the sample size  
 694 of included simulations under those scenarios (see main text for more details).  
 695

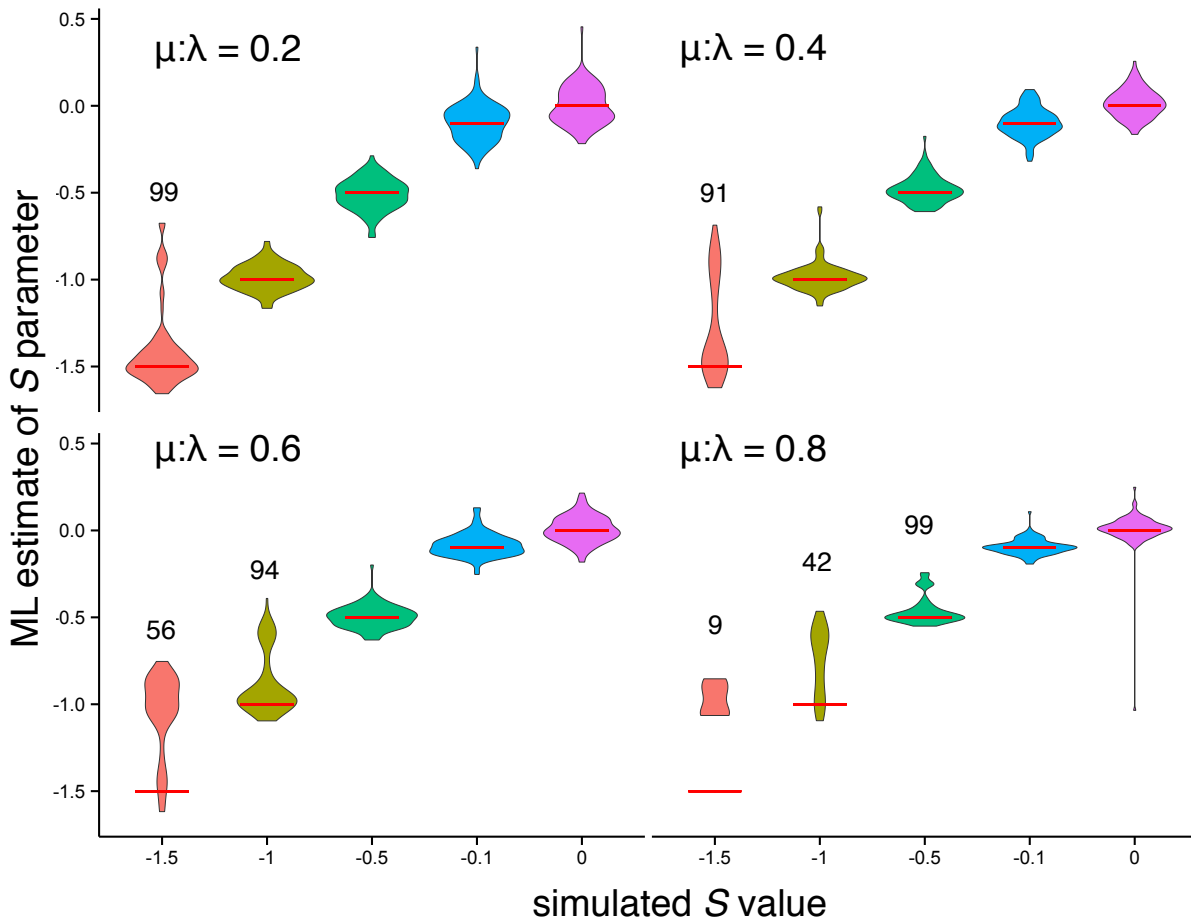

696  
 697

698 *Supplementary Figure 6.* Simulation results showing the effect of varying the extinction fraction  
 699 on estimation of the  $\sigma^2$  parameter for the matching competition model. Red horizontal lines  
 700 indicate the simulated  $\sigma^2$  value (0.05), the numbers below sets of simulations indicate the sample  
 701 size of included simulations under those scenarios (see main text for more details), and the  
 702 number in parentheses indicate sample size after  $\sigma^2$  values  $> 0.25$  were removed.

703

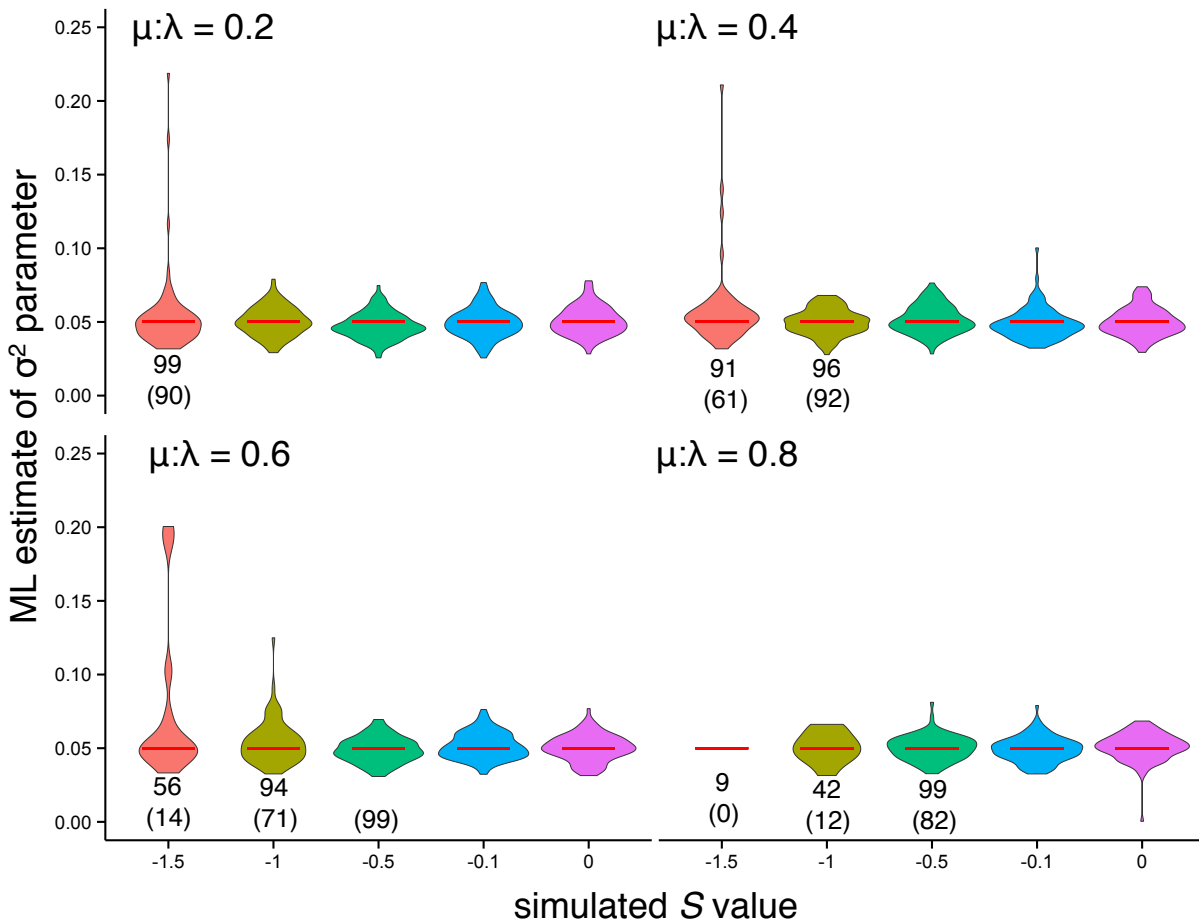

704  
705

706 *Supplementary Figure 7.* Simulation results showing the effect of varying the extinction fraction  
707 on slope (top) and  $\sigma^2$  (bottom) parameters for the exponential diversity-dependent model.  
708 Increasing extinction levels result in increasingly underestimated slope values and  $\sigma^2$  parameters.  
709 Red horizontal lines indicate the simulated parameter values.  
710

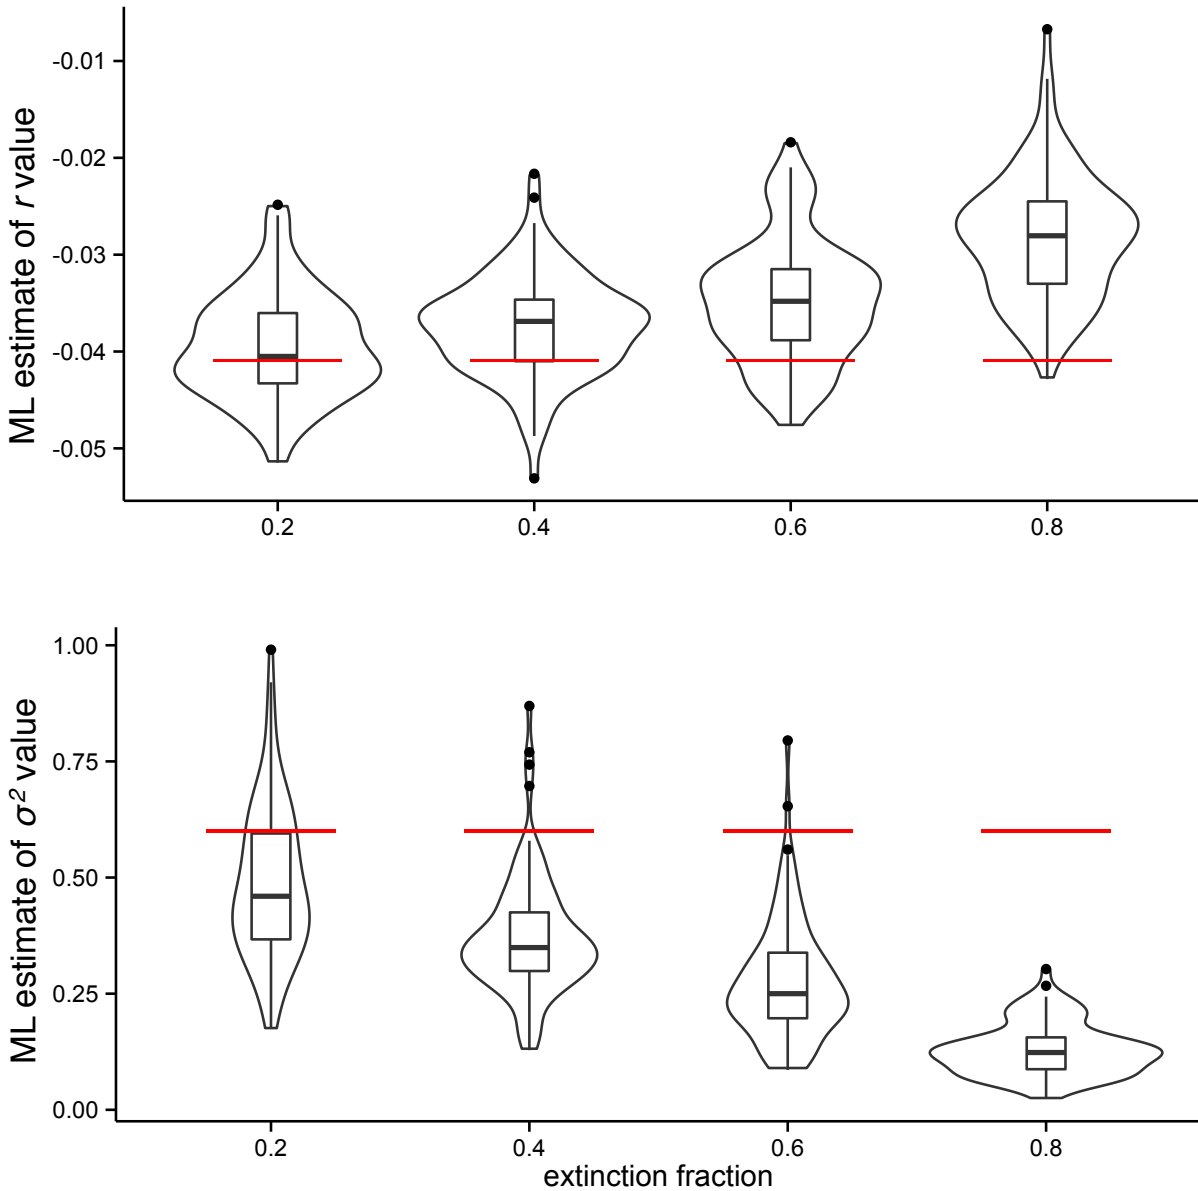

711

712 *Supplementary Figure 8.* Simulation results showing the effect of varying the extinction fraction  
713 on slope (top) and sigma-squared (bottom) parameters for the linear diversity-dependent model.  
714 Increasing extinction levels result in increasingly underestimated slope values and  $\sigma^2$  parameters.  
715 Red horizontal lines indicate the simulated parameter values.  
716

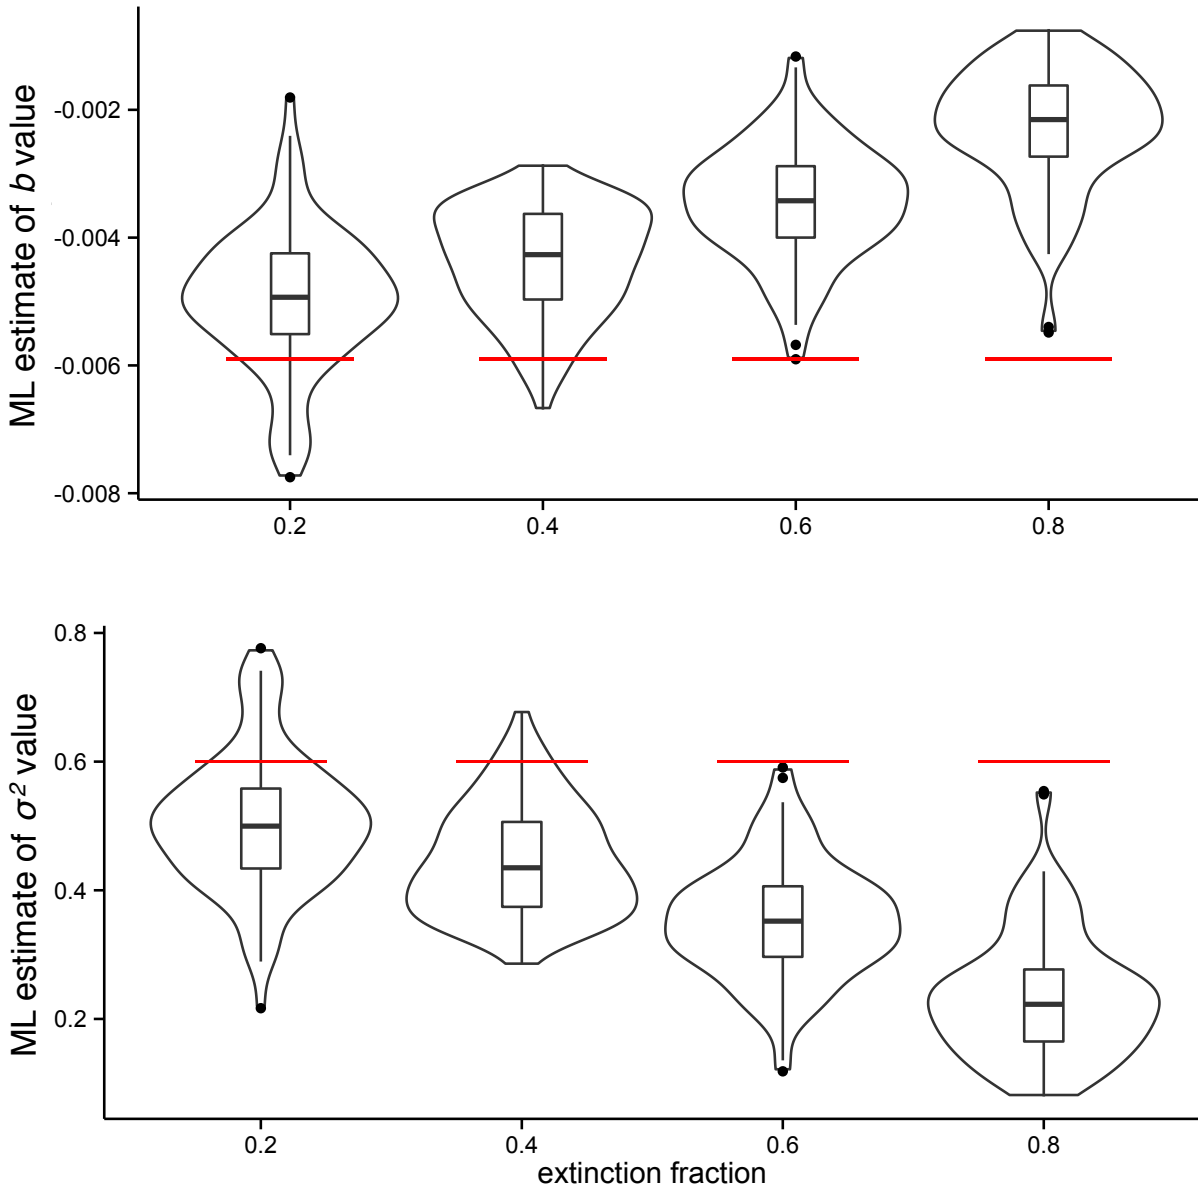

717
